1 **Complement-associated loss of CA2 inhibitory synapses in the**  
2 **demyelinated hippocampus impairs memory**

3

4

5 Valeria Ramaglia<sup>1,5\*</sup>, Mohit Dubey<sup>1</sup>, M. Alfonso Malpede<sup>1</sup>, Naomi Petersen<sup>1</sup>, Sharon I. de  
6 Vries<sup>1</sup>, Dennis S.W. Lee<sup>5</sup>, Geert J. Schenk<sup>3</sup>, Stefan M. Gold<sup>6,7</sup>, Inge Huitinga<sup>4</sup>, Jennifer L.  
7 Gommerman<sup>5</sup>, Jeroen J.G. Geurts<sup>3</sup> and Maarten H.P. Kole<sup>1,2\*</sup>.

8

9

10 <sup>1</sup>Dept. of Axonal Signaling, Netherlands Institute for Neuroscience, Royal Netherlands  
11 Academy of Arts and Sciences, Meibergdreef 47, 1105 BA, Amsterdam, The Netherlands.

12 <sup>2</sup>Cell biology, Biophysics and Neurobiology, Dept. of Biology, Faculty of Science,  
13 University of Utrecht, Padualaan 8, 3584 CH, The Netherlands.

14 <sup>3</sup>Dept. of Anatomy and Neurosciences, Amsterdam University Medical Center, location free  
15 university, MS center Amsterdam, De Boelelaan 1108, 1007 MB, Amsterdam, The  
16 Netherlands.

17 <sup>4</sup>Dept. of Neuroimmunology, Netherlands Institute for Neuroscience, Royal Netherlands  
18 Academy of Arts and Sciences, Meibergdreef 47, 1105 BA, Amsterdam, The Netherlands.

19 <sup>5</sup>Dept. of Immunology, University of Toronto, 1 King's College Circle, Toronto, M5S 1A8  
20 Ontario, Canada.

21 <sup>6</sup>Charité Universitätsmedizin Berlin, Department of Psychiatry and Psychotherapy, Campus  
22 Benjamin Franklin, Hindenburgdamm 30, 12203, Berlin, Germany. <sup>7</sup>Institut für  
23 Neuroimmunologie und Multiple Sklerose (INIMS), Universitätsklinikum Hamburg-  
24 Eppendorf, Hamburg, Germany.

25

26

27 \*Co-corresponding authors: [m.kole@nin.knaw.nl](mailto:m.kole@nin.knaw.nl), Tel: +31 20-566-4594,

28 [v.ramaglia@utoronto.ca](mailto:v.ramaglia@utoronto.ca), Tel: +1 416-978-4119; Fax: +1 416-978-1938.

29

30

31

32

## 33 **Abstract**

34 **The complement system is implicated in synapse loss in the MS hippocampus, but the**  
35 **functional consequences of synapse loss remain poorly understood. Here, in post-**  
36 **mortem MS hippocampi with demyelination we find that deposits of the complement**  
37 **component C1q are enriched in the CA2 subfield, are linked to loss of inhibitory**  
38 **synapses and are significantly higher in MS patients with cognitive impairments**  
39 **compared to those with preserved cognitive functions. Using the cuprizone mouse model**  
40 **of demyelination, we corroborated that C1q deposits are highest within the**  
41 **demyelinated dorsal hippocampal CA2 pyramidal layer, and co-localized with**  
42 **inhibitory synapses engulfed by microglia/macrophages. In agreement with the loss of**  
43 **inhibitory perisomatic synapses, we further found that Schaffer collateral feedforward**  
44 **inhibition but not excitation was impaired in CA2 pyramidal neurons and accompanied**  
45 **by a reduced spike output. Ultimately, we show that these electrophysiological changes**  
46 **were associated with an impaired encoding of social memories. Together, our findings**  
47 **identify CA2 as a critical circuit in demyelinated intrahippocampal lesions and memory**  
48 **dysfunctions in MS.**

49

## 50 **Introduction**

51 Multiple sclerosis (MS) is an autoimmune demyelinating and neurodegenerative disease of  
52 the central nervous system (CNS). Patients living with MS experience major cognitive  
53 disabilities including memory impairment, attention deficits and slowed sensory processing  
54 speed [1, 2], which occurs from the early stages of the disease [3]. Recent emerging insights  
55 have drawn particular attention to MS-related deficits in social cognition and facial emotion  
56 recognition as affected cognitive domains in MS, which can occur early in disease even in the  
57 absence of other cognitive problems [4] and may have distinct neuropathological substrates  
58 [5, 6]. There is substantial evidence that the hippocampus is critical for the consolidation and  
59 recollection of episodic memories, the temporal organization of events and mapping of social  
60 space [7, 8]. Recent magnetic resonance imaging (MRI) studies have shown that structural  
61 and functional disconnections of the hippocampus from several brain networks can explain  
62 some of the clinical deficits experienced by MS patients including impaired memory and  
63 learning [9, 10] as well as depressive symptoms [11, 12]. In addition, post-mortem studies  
64 reported that the hippocampus of MS patients often shows extensive demyelination [13, 14].

65 The molecular and cellular basis of the MS-related hippocampal damage is, however,  
66 not fully understood. One leading hypothesis based on experimental [15, 16] and post-

67 mortem studies [16, 17] indicates that the disconnection of temporal lobe networks in MS  
68 may be due to the loss of synapses via a “pruning” process. Over the past decade, several  
69 studies have identified proteins of the complement system as key components of the pruning  
70 process in development and learning [18-23]. The complement system is traditionally known  
71 as a major arm of the innate immune system, required for optimal defense against pathogens  
72 and for the disposal of dead and dying cells [24]. The recently discovered role for  
73 complement in developmental synaptic pruning has been extensively investigated in the  
74 retinogeniculate system, where exuberant and overlapping synaptic connections are  
75 progressively segregated into eye-specific projections [25]. In this system, supernumerary  
76 synapses are targeted by the complement component 1q (C1q), opsonized by C3, and  
77 phagocytosed by microglia via complement receptor 3 (CR3) [18, 19]. In the rodent brain  
78 C1q has also been shown to play a role in shaping synaptic circuits in memory formation  
79 during adulthood [26], in ageing [27] and in neurodegeneration [22]. A more recent report  
80 showed that synaptic material is tagged by C3 (but not by C1q) and is engulfed by microglia  
81 in the retinogeniculate system of models of demyelination and in the visual thalamus of MS  
82 patients [16]. Our team previously showed that in the MS hippocampus C1q and C3d are  
83 deposited particularly in the CA2/3 region at synapses that localize within microglial  
84 processes and lysosomes, supporting a role for microglia in the elimination and degradation  
85 of synapses [28]. However, the nature of the targeted circuits, the mechanisms of synapse  
86 elimination and the functional consequences of synapse loss in the MS hippocampus are  
87 unknown.

88         Here, we first evaluated the extent of C1q depositions in CA2 versus CA3 regions of  
89 myelinated and demyelinated MS hippocampi, and related it to synaptic changes, MRI  
90 measures of brain atrophy and the cognitive status of the patient. To further investigate the  
91 significance of C1q deposition and synaptic changes observed in the MS hippocampus, we  
92 studied the extent and localization of C1q/C3 proteins in relation to synapses in the cuprizone  
93 model. Electrophysiological recordings were acquired, and social memory performance was  
94 tested to evaluate the consequences of subfield-specific synaptic changes in cuprizone-fed  
95 mice. Together, our findings identify the CA2 region of the hippocampus as a subfield that is  
96 highly susceptible to complement deposition and synaptic reorganization of inhibitory circuit  
97 in MS. These changes may play a critical role in altering hippocampal information flow  
98 underlying cognitive deficits in the social domain.

99

100

101

## 102 **Materials & Methods**

### 103 *Human studies*

104 **Post-mortem hippocampal tissue collection.** Post-mortem hippocampi of 55 MS donors  
105 and 5 non-neurological control (NNC) donors were obtained from the Netherlands Brain  
106 Bank (NBB; Amsterdam, the Netherlands). NBB autopsy procedures were approved by the  
107 Independent Review Board of the Amsterdam UMC, registered with US office of Human  
108 Research Protections. Written informed consent was obtained by the NBB for brain autopsy  
109 and for the use of material and clinical data for research purposes, in compliance with  
110 institutional and national ethical guidelines. Brains were removed according to a rapid (post-  
111 mortem delay (PMDS) of  $6.7 \pm 3.2$  hours, mean  $\pm$  SD) autopsy protocol. Specimens were  
112 fixed in 10% buffered formalin and processed for embedding in paraffin. Paraffin-embedded  
113 hippocampi of all donors were used for the pathological study. Of these, hippocampi of 14  
114 MS donors were selected for pathological-MRI correlation studies and hippocampi of 18 MS  
115 donors were selected for pathological-clinical correlation studies. Coronally cut hippocampi  
116 were selected to ensure accurate and systematic scoring of demyelination, C1q deposition and  
117 synaptic changes within the anatomical subfields of the hippocampus. MS cases and controls  
118 were matched for age, all numbers represent mean  $\pm$  SD (MS myelinated [MS-M] donors:  
119  $65.2 \pm 12.0$  years; MS demyelinated [MS-DM] donors:  $63.5 \pm 15.3$  years; NNC donors:  $64.4$   
120  $\pm 15.4$  years; one-way ANOVA  $P = 0.94$ ) and PMD (MS-M donors:  $7.4 \pm 3.8$  hours; MS-D  
121 donors:  $5.8 \pm 2.3$  hours; NNC donors:  $6.9 \pm 1.7$  hours; one-way ANOVA  $P = 0.15$ ). MS  
122 paraffin-embedded hippocampi used for immunostaining were from 29 donors with primary  
123 (PP) or secondary progressive (SP) disease and 26 donors with progressive disease of  
124 undetermined type (PP/SP). In this study, PP, SP, and PP/SP donors were pooled and referred  
125 to as progressive MS. Detailed clinicopathological data of all donors are provided in  
126 **Supplementary Table 1.**

127

128 **Magnetic resonance imaging (MRI).** The MRI protocol comprises both whole-brain in-situ  
129 MRI, and MRI of 10-mm thick coronal brain slices, which are cut at autopsy. A detailed  
130 description was previously published [29]. MR imaging was performed using 1.5T Siemens  
131 Sonata and Avanto MRI scanners, depending on the availability at the time of autopsy, as  
132 described previously [30]. Briefly, the *in-situ* image acquisition protocol for volumetry of the  
133 hippocampus included a sagittal 3DT1-weighted imaging sequence (TR = 2700 ms, TE = 5.1  
134 ms, TI = 950 ms, FA = 8, voxel size =  $1.2 \times 1.2 \times 1.3$  mm) and a sagittal 3D-FLAIR

135 sequence (TR = 6500 ms, TE = 355 ms, TI = 2200 ms, voxel size = 1.2 × 1.2 × 1.3 mm). The  
136 3DT1 images were used to measure whole hippocampus volumes corresponding with the  
137 hemisphere of the tissue samples extracted for neuropathological assessment using the  
138 FreeSurfer image analysis suite version 5.3, which is documented and freely available for  
139 download online (<http://surfer.nmr.mgh.harvard.edu/>).

140

141 **Evaluation of cognitive function. Evaluation of cognitive function.** Inspecting the clinical  
142 data of all cases included in the MS post-mortem collection of the Netherlands Brain Bank  
143 (<http://www.brainbank.nl/>), we identified MS cases for which neuropsychological  
144 information was available. Using clinical chart information on cognitive status has proven  
145 successful in post-mortem research before [13]. The demographic and clinical data of the  
146 selected CP and CI cases are summarized in **Supplementary Table 1**. By excluding any  
147 cases 1) without detailed information on cognition, 2) with a neuropsychological history (e.g.  
148 depression, character changes) and 3) that had any other non-MS pathology (e.g. vascular  
149 pathology), we were able to select high quality post-mortem material from cognitively  
150 preserved (CP;  $n = 7$ ) and cognitively impaired (CI;  $n = 7$ ) MS patients. All included CI  
151 patients had memory problems that were often accompanied by disturbed linguistic  
152 capabilities.

153

154 **Hippocampal Lesion Classification.** Hippocampal tissue sections were stained for  
155 proteolipid protein (PLP) and for the anti-human leukocyte antigen (HLA<sub>DP-DQ-DR</sub>). Because  
156 the distribution of HLA<sub>DP-DQ-DR</sub>-immunopositive microglial cells did not segregate with  
157 lesional areas, samples were scored for the presence of lesions according to their anatomical  
158 location and not lesion activity. Only intrahippocampal lesions were scored.

159

160 **Immunohistochemistry.** For the immunohistochemistry, endogenous peroxidase activity  
161 was blocked by incubating the slides in methanol with 0.3% H<sub>2</sub>O<sub>2</sub> for 20 minutes at room  
162 temperature (RT). Sections were washed in 1× PBS (9 minutes) and put in a microwave on  
163 “High” power settings for 20 minutes in 10 mM Tris/1 mM Ethylenediaminetetraacetic acid  
164 (EDTA) buffer pH.9 (**Supplementary Table 2**). Sections were rinsed in 1× PBS, outlined  
165 with a hydrophobic pen, washed in 1× PBS and PBST (3 minutes). The sections were then  
166 blocked with normal goat serum in PBST (1:1) for 30 minutes at RT before being incubated  
167 with the relevant primary antibody (**Supplementary Table 2**) diluted in Normal Antibody  
168 Diluent (Immunologic, Duiven, The Netherlands) for 1 hour at RT and then overnight at 4°C.

169 The next day, slides were rinsed in PBST (9 minutes) and incubated with Post Antibody  
170 Blocking BrightVision Solution 1 (diluted 1:1 in PBST, ImmunoLogic) for 15 minutes at RT.  
171 They are then washed in 1× PBS and incubated with BrightVision Poly-HRP-Anti Ms/Rb/Rt  
172 IgG Biotin-free Solution 2 (diluted 1:1 in PBST, ImmunoLogic) for 30 minutes at RT. The  
173 immunostaining was visualised using 3,3'-Diaminobenzidine (DAB, Sigma-Aldrich) for 4  
174 minutes at RT. The sections were counterstained with hematoxylin. Sections were then  
175 dehydrated in a series (50%, 70%, 100%, 100%) of ethanol and xylene (3 minutes). The  
176 slides were mounted using Entellan medium. All stained images were scanned using an Axio  
177 Imager Z1, Zeiss microscope connected to a digital camera (AxioCam 506 mono, Zeiss) and  
178 imaged with Zen pro 2.0 imaging software (Zeiss).

179

180 **Immunofluorescence staining of synapses.** For the fluorescent immunostaining of pre- and  
181 postsynaptic elements, sections were pretreated with microwave antigen retrieval as  
182 described above. Primary antibodies against the presynaptic elements vesicular glutamate  
183 transporter 1 (vGLUT1) or vesicular GABA transporter (vGAT) (see **Supplementary Table**  
184 **2**) were diluted in normal antibody diluent (Immunologic, Duiven, the Netherlands) and  
185 incubated for 3 hours at RT followed by overnight incubation at 4°C. The next day, sections  
186 were washed in PBS and incubated in primary antibodies against the postsynaptic elements  
187 postsynaptic domain 95 (PSD95) or Gephyrin (see **Supplementary Table 2**) diluted in  
188 normal antibody diluent for 4 hours at RT followed by 2 overnights incubation at 4°C. Two  
189 days later, sections were washed in PBS and incubated in polyclonal IgG donkey anti-guinea  
190 pig Alexa488-conjugated (Jackson, A-S155) and the polyclonal IgG donkey anti-rabbit  
191 Alexa546-conjugated (Invitrogen, A-S154) secondary antibodies or the polyclonal IgG  
192 donkey anti-chicken Alexa488-conjugated (Jackson, A-S153) and the polyclonal IgG donkey  
193 anti-mouse Alexa546-conjugated (Molecular probes, A-S032) secondary antibodies diluted  
194 1:200 in PBS supplemented with 3% donkey serum with 0.1% triton for 3 hours at RT. After  
195 washing in PBS, sections were incubated with 40,6-diamidino-2-phenylindole (DAPI; Vector  
196 Laboratories) to visualize the nuclei, incubated in Sudan Black B for 5 minutes at RT. After  
197 washing in 70% ethanol and sqH<sub>2</sub>O, the slides were air dried and mounted in aqueous  
198 mounting medium. Using the appropriate filters, the immunofluorescence signal was  
199 visualized with an Axio Imager Z1, Zeiss microscope connected to a digital camera  
200 (AxioCam 506 mono, Zeiss) and imaged with Zen pro 2.0 imaging software (Zeiss). To  
201 control for antibodies specificity, tissue sections were stained according to the IF or IHC

202 protocols described above except for the primary antibody incubation step, which was  
203 omitted.

204

205 **Quantification of immunohistochemistry.** Formalin-fixed paraffin embedded tissue blocks  
206 were cut into 7 $\mu$ m sections on a microtome (ThermoScientific HM 325), mounted onto  
207 Superfrost Plus glass slides and dried overnight at 37°C. Sections were deparaffinized in  
208 xylene (2  $\times$  5 minutes), rehydrated through a series (100%, 70%, 50%) of ethanol and sqH<sub>2</sub>O  
209 (3 minutes). For the CA2 and CA3 subfields 3 randomly selected nonoverlapping digital  
210 images were captured for quantification. Therefore, for each immunostaining, a total of 30  
211 images (3 images  $\times$  2 subfields  $\times$  5 donors) of NNCs, 186 images (3 images  $\times$  2 subfields  $\times$  31  
212 donors) of MS-M hippocampi, and 144 images (3 images  $\times$  2 subfields  $\times$  24 donors) of MS-  
213 DM hippocampi were captured at x20 magnification and analysed. Quantitative analysis of  
214 immunostaining was performed on the region of interest (ROI) using the measurement  
215 function of ImageJ 1.15s (National Institutes of Health). Briefly, the RGB images were  
216 separated into single color channels using the color deconvolution plugin in Image J. The  
217 single-color channel for each staining was subjected to thresholding to create a mask that  
218 captures the specific staining. The threshold was saved and applied to all images in the same  
219 staining group. The area fraction measurement was applied to each ROI to quantify the  
220 percentage of thresholded staining. The amount of staining is expressed as percentage of  
221 immunoreactive area over the total area assessed.

222

223

#### 224 *Animal studies*

225 All animal experiments were performed in compliance with the European Communities  
226 Council Directive 2010/63/EU effective from 1 January 2013. The experiments were  
227 evaluated by the KNAW Animal Ethics Committee (DEC) and Central Authority for  
228 Scientific Procedures on Animals (CCD, license AVD8010020172426). The specific  
229 experimental designs were evaluated and monitored by the Animal Welfare Body (IvD,  
230 protocols NIN18.21.01, NIN19.21.06 and NIN19.21.07). Male C57BL/6 mice (Janvier Labs,  
231 Saint-Berthevin Cedex, France) were kept on a 12:12 h light-dark cycle (lights on at 07.00  
232 am, lights off at 19.00 pm) with ad libitum food and water. Demyelination was induced by  
233 cuprizone feeding [31]. From the age of 5–6 weeks and a bodyweight >20 grams (on average  
234 21.6 g, range: 20.5 – 22.8 g), mice were fed with 0.2% cuprizone supplemented to the

235 powder food, freshly prepared every second day for a period between 2 and 9 weeks as  
236 indicated in the text. The associated weight loss with cuprizone treatment was assessed every  
237 second day and monitored in consultation with the IvD.

238

239 **Behavioral tests.** The *five-trial social memory test* was based on the design from Hitti &  
240 Siegelbaum [32]. All mice ( $n = 11$  control and 11 cuprizone treated mice, 0.2% for 7 weeks)  
241 were maintained group-housed (3–4 mice/cage) before the test and the sequence of testing  
242 was determined randomly. Social memory tests were performed between 08.00 am and 15.00  
243 pm. For the test the subject mouse was transferred to the experimental room and allowed to  
244 familiarize with the cage for 15 minutes with the lid closed. After 15 minutes, the lid was  
245 removed, and the webcam recording started (~30 Hz frame rate). At this point, the subject  
246 mouse was exposed to a novel male mouse for the duration of 1 minute (trial 1). The novel  
247 mouse was removed for 10 minutes. Subsequently, the same procedure was repeated three  
248 more times (i.e. subject mouse exposed to the familiar mouse, trials 2, 3 and 4). In trial 5, an  
249 unfamiliar mouse was introduced to measure dishabituation. The behaviors of the subject  
250 mouse were analysed off-line. The behavioural scoring included the duration of anogenital  
251 sniffing, approaching behavior, social interaction, aggressive interaction or no interaction.  
252 The occurrence and durations of these distinct behaviors were measured by two different  
253 researchers, both blinded to the animal identities, until the data were analysed and plotted.

254 For automated *discrimination learning* experiments (Sylics Bioinformatics,  
255 Amsterdam, The Netherlands) we used PhenoTyper cages (model 3000, Noldus Information  
256 Technology). The system is an automated home cage in which behavior is tracked by a video.  
257 The cage is equipped with a drinking bottle and a triangular-shaped shelter with two  
258 entrances in one corner. In the opposite corner, an aluminum tube of an automated food  
259 reward dispenser protruded into the cage. Mice ( $n = 9$  control and 13 cuprizone-treated mice,  
260 0.2% for 6 weeks) had *ad libitum* access to drinking water but needed to engage for food  
261 reward in the Cognition Wall discrimination test. The wall contained three entrances and  
262 when they passed through the left entrance, they automatically obtained a food pellet  
263 (Dustless Precision Pellets, 14 mg, Bio-Serve). The rate at which a mouse gains a relative  
264 preference for the rewarded entrance is used as a measure of discrimination learning. Mice  
265 were single housed for one week to accommodate to the 16 hours periods in which they were  
266 housed in the PhenoTyper cages and experiment started 3 hours before lights-off (16.00 pm).  
267 C57BL/6J mice require typically around 100 food rewards/per day to maintain body weight.  
268 We analyzed the total number of entries needed to reach a criterion of 70% to 90% correct,



269 computed as a moving window over the last 30 entries to assess learning in the task. Since  
270 this performance measurement uses the fraction of correct over incorrect entries in the last 30  
271 entries rather than the total number of entries or latency to reach criterion, this measurement  
272 is not likely to be influenced by general differences in activity between genotypes or groups.  
273 Hence, mice cannot achieve the learning criterion by only showing increased motor activity  
274 and making more entries.

275

276 **Hippocampus slice preparation and electrophysiological recordings.** Mice received a  
277 terminal dose of Nembutal (5 mg kg<sup>-1</sup>) and were transcardially perfused with ice-cold  
278 artificial cerebrospinal fluid (ACSF) consisting of (in mM): 87.0 NaCl, 25.0 NaHCO<sub>3</sub>, 2.5  
279 KCl, 25.0 NaH<sub>2</sub>PO<sub>4</sub>, 75.0 sucrose, 25.0 glucose, 0.5 CaCl<sub>2</sub> and 7.0 MgCl<sub>2</sub> (oxygenated with  
280 5% CO<sub>2</sub>–95% O<sub>2</sub>, pH 7.4). And after 20 minutes replaced for storage solutions containing  
281 125 NaCl, 3 KCl, 25 glucose, 25 NaHCO<sub>3</sub>, 1.25 Na<sub>2</sub>H<sub>2</sub>PO<sub>4</sub>, 1 CaCl<sub>2</sub>, 6 MgCl<sub>2</sub>, 1 kynurenic  
282 acid (95% O<sub>2</sub> and 5% CO<sub>2</sub>, pH 7.4). After decapitation, the brain was quickly removed from  
283 the skull and the hippocampus was isolated from the inside of the cortical mantle in an ice-  
284 cold (0 to +4°C) dissecting solution. The isolated hippocampus was placed in the groove of  
285 an agar block with the anterior part facing upward. Transverse hippocampal sections (400  
286 µm) were cut starting at the dorsal site of the hippocampus using a Vibratome (1200VT,  
287 Leica Microsystems). Slices were allowed a recovery period of 30 min at 35°C and were  
288 subsequently stored at room temperature. For patch-clamp recordings, slices were transferred  
289 to an upright microscope (BX51WI, Olympus Nederland) equipped with oblique illumination  
290 optics (WI-OBCD; numerical aperture, 0.8). CA2 pyramidal cells located deep in the slice  
291 were visualized using 40× water-immersion objectives (Olympus) and oblique LED  
292 illumination optics (850 nm) based on the curvature of the pyramidal layer, the typical large  
293 soma and triangle shape. Some neurons showed a proximal bifurcation in the main apical  
294 dendrite. The microscope bath was perfused with oxygenated (95% O<sub>2</sub>, 5% CO<sub>2</sub>) ACSF  
295 consisting of the following (in mM): 125 NaCl, 3 KCl, 25 D-glucose, 25 NaHCO<sub>3</sub>, 1.25  
296 Na<sub>2</sub>H<sub>2</sub>PO<sub>4</sub>, 2 CaCl<sub>2</sub>, and 1 MgCl<sub>2</sub>.

297 Patch pipettes were pulled from borosilicate glass (Harvard Apparatus, Edenbridge,  
298 Kent, UK) to an open tip of 3–6 MΩ resistance. For all current-clamp recordings the  
299 intracellular solution contained (in mM): 130 K-Gluconate, 10 KCl, 4 Mg-ATP, 0.3 Na<sub>2</sub>-  
300 GTP, 10 HEPES and 10 Na<sub>2</sub>-phosphocreatine (pH 7.25 adjusted with KOH, 280 mOsmol  
301 kg<sup>-1</sup>). The liquid junction potential difference of –13.5 mV was corrected in all recordings.

302 All voltage recordings were analogue low-pass filtered at 10 kHz (Bessel), recorded using  
303 DAGAN BVC 700 amplifiers and digitally sampled at 100 kHz using an ITC-18 A-D  
304 converter (HEKA Elektronik Dr. Schulze GmbH, Germany). Bridge-balance and pipette or  
305 stray capacitances were fully compensated based on small current injections leading to  
306 minimal voltage errors. All data acquisition and analyses were performed with Axograph X  
307 (v.1.7.0, NSW, Australia, <https://www.axograph.com/>). The recording temperature was  $34 \pm$   
308  $1^\circ\text{C}$ . Only cells with a stable bridge-balance ( $< 25 \text{ M}\Omega$ ) and resting membrane potential  
309 throughout the recording session were included in the analyses.

310

311 **Morphological analysis and pyramidal cell identification.** For single cell biocytin-  
312 labelling, recorded neurons were filled with  $5 \text{ mg ml}^{-1}$  biocytin for at least 30 minutes.  
313 Streptavidin biotin-binding protein (Streptavidin Alexa 488, 1:500, Invitrogen) was diluted in  
314 5% BSA with 5% NGS and 0.3% Triton-X overnight at  $4^\circ\text{C}$ . To identify the CA2 region,  
315 primary antibody rabbit anti-PCP4 (1:250 Sigma Aldrich, HPA005792) or mouse anti-  
316 RGS14 (1:500, Neuromab) were added to an overnight incubation mix. Secondary antibodies  
317 were Alexa 633 goat anti-rabbit (1:500; Invitrogen) or Alexa 633 goat anti-mouse (1:500;  
318 Invitrogen). Brain slices were mounted on glass slides and cover slipped with Vectashield  
319 H1000 fluorescent mounting medium (Vector Laboratories, Peterborough, UK) and sealed.  
320 Sections were imaged using a confocal laser-scanning microscope (SP8, DM6000 CFS;  
321 acquisition software, Leica Application Suite AF v3.2.1.9702) with  $40\times$  oil-immersion  
322 objectives and  $1\times$  digital zoom with step size of  $0.5 \mu\text{m}$ . Alexa 488 and Alexa 633 were  
323 imaged using 488 and 633 excitation wavelengths, respectively. Confocal  $z$ -stacks were  
324 imported into Neurolucida 360 software (v2020, MBF Bioscience) for reconstruction using  
325 the interactive user-guided trace with the Directional Kernels method. Axon and basal and  
326 apical dendrite segments were analyzed using Neurolucida Explorer (MBF Bioscience).

327

328 **Immunohistochemistry and synapse staining.** Mice were anaesthetised with Nembutal ( $5$   
329  $\text{mg kg}^{-1}$ ), the brain rapidly removed and immersion-fixed with 4% PFA overnight at room  
330 temperature. The fixed brains were briefly rinsed in PBS (Phosphate Buffer Solution) before  
331 sunken in 30% sucrose/PBS solution at  $4^\circ\text{C}$ , frozen with dry ice and stored at  $-80^\circ\text{C}$ . One  
332 day before the experiment the frozen brains were moved to  $-20^\circ\text{C}$  and stored overnight. The  
333 day of the experiment  $14 \mu\text{m}$  sagittal or coronal sections were produced with a freezing-  
334 sliding microtome and stored in PBS at  $4^\circ\text{C}$ . Free floating sections were permeabilized at RT

335 with 10% normal goat serum in 0.3% Triton X-100 in PBS for 2 h, followed by primary  
336 antibody incubation overnight at 4°C. Primary antibodies used, dilution and sources are  
337 provided in **Supplementary Table 2**. After rinsing 3× in PBS for 15 min, sections were  
338 incubated with secondary antibodies (1:500) in PBS with 3% goat serum for 2 h at room  
339 temperature. After rinsing 3× in PBS for 15 min, sections were mounted on glass slides,  
340 using vectashield containing DAPI (Vector labs H-1000). Fluorescence signals were imaged  
341 with a Leica TCS SP5 II (DMI6000 CFS; acquisition software Leica Application Suite AF v.  
342 2.6.3.8173) or SP8 confocal laser-scanning microscope (DM6000 CFS; acquisition software,  
343 Leica Application Suite AF v3.2.1.9702, Leica Microsystems GmbH). Confocal images used  
344 for the intensity analysis were acquired at 1,096 × 1,096 pixels (2.0 or 3.0 μm z-step) using a  
345 10× objective. Density of puncta were acquired at 1,096 × 1,096 pixels (2.0 or 3.0 μm z-step)  
346 using a 40× or 63× oil-immersion objectives (0.75–1.0 digital zoom). To avoid bleed through  
347 between emission wavelengths, automated sequential acquisition of multiple channels was  
348 used, and images saved as uncompressed LIF format.

349

350 **Electron Microscopy.** Tissue for electron microscopy was obtained from adult mice that  
351 were transcardially perfused and postfixed with freshly prepared 2% PFA and 2.5%  
352 glutaraldehyde in a 0.1M phosphate buffer (PB) pH 7.4. All steps were done at room  
353 temperature, unless stated otherwise. After subsequent washes in PB, tissues were cryo-  
354 protected through a gradient of 10%, 20% and 30% sucrose in PB and frozen on aluminium  
355 boats on dry ice. Coronal sections of 40 μm containing the hippocampus were obtained using  
356 a freezing microtome. Frozen coronal sections of the hippocampus were washed in PB, slices  
357 were blocked 2 hours with 5% normal goat serum in PB and incubated overnight with rabbit-  
358 α-C1q antibody (1:1000 in blocking solution) while shaking. Slices were washed in PB,  
359 incubated for 2 hours with a horseradish peroxidase coupled rabbit secondary antibody,  
360 washed in PB, pre-incubated for 20 minutes with 0.05% 3,3'-diaminobenzidine (DAB) in PB  
361 and incubated for 5' with DAB and 0.03% H<sub>2</sub>O<sub>2</sub> for visualization. The DAB reaction product  
362 was then intensified using the gold-substituted silver peroxidase method as previously  
363 described [33]. Briefly, slices were rinsed in 2% sodium acetate buffer and incubated for 2  
364 hours in 10% sodium thioglycolate on a shaker. After multiple washes with the acetate  
365 buffer, slices were incubated for 6 minutes with silver solution, consisting of 2.5% sodium  
366 carbonate, 0.1% ammonium nitrate, 0.1% silver nitrate, 0.5% tungstenosilic acid and 0.07%  
367 formalin. Following washes with acetate buffer, slices were incubated with 0.05% gold

368 chloride for 20 min, rinsed with acetate buffer and incubated with 3% sodium thiosulfate for  
369 5 min. After rinsing with acetate buffer, slices were rinsed several times with 0.1M sodium  
370 cacodylate buffer (pH 7.4) and post-fixed for 20 min in 1% osmium tetroxide supplemented  
371 with 1.5% ferricyanide in cacodylate buffer. Subsequently, the tissue was dehydrated using a  
372 gradient of 30%, 50%, 70%, 80%, 90% and 100% ethanol followed by acetone. After  
373 incubating for 30 minutes in a 1:1 mixture of acetone with epoxy, slices were incubated for  
374 30 min in pure epoxy and left at 65°C overnight to harden. With an Ultracut UCT ultrathin 70  
375 nm sections were made and collected on electron microscopy grids with a formvar film.  
376 Contrasting of the tissue was achieved by incubation with 0.5% uranyl acetate for 4 min,  
377 followed by extensive washing with milliQ and drying to the air, and subsequent incubation  
378 with lead citrate for 2 minutes. Ultrathin sections were examined with a FEI Tecnai G12  
379 electron microscope (FEI, Europe NanoPort, Eindhoven, the Netherlands) and images  
380 obtained with a Veleta camera, acquired as 16-bits TIF files. Images were saved in tiff format  
381 and analyzed using Fiji (ImageJ). We examined > 100 sections from 3 mice/group.

382

383 **Anti-Mouse MOG IgG ELISA.** Serum was collected from animals at various timepoints  
384 following transfer to cuprizone diet and were kept frozen at -20°C until required. Samples  
385 were assayed using Anaspec SensoLyte® Anti-Mouse MOG (1-125) IgG Quantitative  
386 ELISA kits (AS-55156). Briefly, 96-well plates precoated with recombinant mouse MOG  
387 protein (1-125) were incubated with 50 µL of the appropriate samples or standard with  
388 gentle shaking at RT for 1 hour. Each sample was diluted in sample buffer at 1:100 and  
389 subject to 1:4 serial dilutions up to 1:6400. Each sample was plated in duplicate on the  
390 precoated/preblocked plate. Following sample incubation, samples were washed 5 times with  
391 wash buffer and incubated with anti-mouse IgG-HRP (1:2000 dilution) with gentle shaking at  
392 RT for 1 hour. Following incubation with secondary antibody, the plate was washed 5 times  
393 and 100 µL of TMB was added to detect level of anti-MOG IgG via optical density at 450  
394 nm using a spectrophotometer. Serum from hMOG-immunized EAE mice at the chronic  
395 phase of disease were used as a positive control for this assay and was assayed at a starting  
396 dilution of 1:100 subjected to 1:4 serial dilutions up to 1:1638400.

397

398 **Statistical analysis.** All tests were performed using GraphPad Prism software (versions 5 to  
399 8, GraphPad Software Inc, San Diego, CA, USA). Sample sizes for the animal experiments  
400 and electrophysiological recordings were determined by performing power tests with a type  
401 II error set to 0.8. The type of variability of distributions were assessed by Shapiro-Wilk

402 normality test. The non-normally distributed data was analysed with non-parametric Mann-  
403 Whitney test if two groups were compared or with the non-parametric Kruskal-Wallis test  
404 followed by Dunn's correction for multiple comparisons if >2 groups were compared.  
405 Correlation analyses of non-normally distributed data was performed by Spearman  
406 correlation coefficient. If data were normally distributed data groups were analysed by either  
407 ordinary two-way or repeated measures (RM) parametric analysis of variance (ANOVA)  
408 followed by post-hoc analyses with Sidak's or Dunnett's correction for multiple comparisons.  
409 For all tests, the null hypothesis was rejected with  $P < 0.05$  at a 95% confidence interval.

410

411

412

#### 413 **Data availability.**

414 All raw data supporting the findings of this study are available from the corresponding  
415 authors upon reasonable request.

416

#### 417 **Results**

##### 418 **CA2 enrichment of C1q deposits in the atrophic demyelinated MS hippocampus.**

419 To test for demyelination-dependent or -independent changes in C1q, the  
420 immunohistochemical analyses conducted in this study included both myelinated and  
421 demyelinated MS hippocampi. To this end, using a collection of post-mortem hippocampal  
422 tissue from 55 MS cases and 5 non-neurological controls (NNC), we first performed  
423 immunostaining for the PLP marker of myelin and identified 31 cases with myelinated,  
424 lesion-free, MS hippocampus (MS myelinated, MS-M) and 24 MS cases with partly or  
425 completely demyelinated hippocampus (MS demyelinated, MS-DM) (**Fig. 1a**). Consistent  
426 with previous work [28], the hippocampi from NNCs showed no sign of demyelination. In  
427 addition, and in line with previous reports [13, 34], the MS samples showed only a slightly  
428 increased HLA-DP-DQ-DR staining, suggesting enhanced microglial reactivity generally  
429 restricted to hippocampal areas in the context of preserved PLP myelin staining was  
430 preserved (data not shown).

431 Our previous work indicated that the amount of C1q immunoreactivity in the MS  
432 hippocampus was high in CA2/3 compared to other hippocampal subfields, including CA1  
433 and subiculum [28]. Since it is becoming increasingly clear that the CA2 hippocampal  
434 subfield has a cytoarchitecture, connectivity, gene expression and neurochemistry

435 functionally distinct from CA1 and CA3 [32, 35-37], we aimed to examine whether  
436 demyelination may have subfield-specific alterations. The C1q levels were determined by  
437 immunohistochemistry and the boundaries between CA3 and CA2 were based on  
438 cytoarchitectural criteria such as the higher cell packing density and larger CA2 pyramidal  
439 neurons somata [38]. Furthermore, because C1q expression in the CNS increases with normal  
440 ageing [27], we age-matched the donors to control for age-dependent changes in our samples.  
441 We confirmed the previously observed punctate staining pattern of C1q on and around  
442 hippocampal neurons, which was more obvious in MS cases compared to controls (**Fig. 1b**).  
443 In particular, C1q-coated CA2 neurons of MS-DM cases had a dystrophic appearance with  
444 decentered nuclei, suggestive of neuronal injury (**inset, Fig. 1b**). Comparative analysis of the  
445 intensities showed that in the CA2 region of MS-DM hippocampi the amount of C1q  
446 deposition was on average ~10-fold increased compared to NNCs and ~3-fold compared to  
447 MS-M ( $P < 0.0001$  for both, **Fig. 1c**) but not within CA3 (**Fig. 1c**). Because C1q deposits  
448 were enriched in CA2 compared to CA3 in the demyelinated MS hippocampus (Sidak's  
449 multiple comparison test  $P < 0.0013$ ) we next asked whether the density of C1q deposition in  
450 CA2 could be linked to hippocampal atrophy. Correlation analyses between the density of  
451 C1q staining and volumetric changes of the hippocampus as measured by post-mortem MRI  
452 revealed a significant correlation between the extent of C1q deposition and hippocampal  
453 volume ( $P = 0.015$ , **Fig. 1d**), demonstrating an association between C1q in CA2 and  
454 hippocampal atrophy in progressive MS donors. Furthermore, since the hippocampus is of  
455 critical importance for spatial and emotional memory, we next asked whether there is a link  
456 between C1q deposition in cognitive functions. Comparison of the immunofluorescence  
457 density of C1q in MS cases with or without documented impairment of cognitive function  
458 (based on available clinical records) showed that MS cases with impaired cognitive function  
459 had a significantly and 4.3-fold higher amount of C1q deposits in CA2 than those patients  
460 without evidence of cognitive problems (Sidak's multiple comparison test  $P < 0.001$ , **Fig.**  
461 **1e**). While the difference was also detectable in CA3 (Sidak's test  $P < 0.05$ , **Fig. 1e**) the C1q  
462 expression was substantially higher within the CA2 region (two-way ANOVA, subfield  $P <$   
463  $0.0254$ ). Together with the significantly higher expression in the larger data set (**Fig. 1c**)  
464 these results indicate that the CA2 region shows an increased sensitivity to complement  
465 activation in MS.

466

467 **Loss of GABAergic and gain of glutamatergic synapse markers in the CA2 subfield of**  
468 **the MS hippocampus.** While a common finding from our previous studies [28] and others

469 [39, 40], is that synapses are lost in the MS hippocampus, which synapses are selectively  
470 changed within the CA2 hippocampal subfield is not well understood. We performed  
471 immunofluorescence staining for the presynaptic vesicular glutamate transporters 1  
472 (vGLUT1) and a postsynaptic element of excitatory synapses the postsynaptic domain 95  
473 (PSD95), as well as a presynaptic marker for gamma-aminobutyric acid (GABA)ergic  
474 synapses, the vesicular GABA transporter (vGAT), and a postsynaptic elements of inhibitory  
475 synapses (gephyrin). Quantification analysis of presynaptic elements in CA2 showed that  
476 compared to NNCs the amount of vGLUT1<sup>+</sup> synapses was increased in MS tissue by 2.4-fold  
477 (One-way ANOVA  $P < 0.0001$ ) while the amount of vGAT<sup>+</sup> synapses in MS hippocampi  
478 was decreased 2-fold (One-way ANOVA  $P = 0.0267$ ) (**Fig. 2a-d**). Similar changes were  
479 observed in the CA2 of MS-M cases (vGLUT<sup>+</sup> puncta, 2.5-fold increase in MS-M vs NNCs,  
480  $P < 0.01$ ; vGAT<sup>+</sup> puncta, 1.8-fold decrease in MS-M vs NNCs,  $P < 0.01$ , **Fig. 2a-d**).  
481 Furthermore, quantification analysis of postsynaptic elements in CA2 showed that compared  
482 to NNCs, the amount of PSD95<sup>+</sup> synapses was increased 2-fold ( $P < 0.01$ ) while, in striking  
483 contrast, the amount of gephyrin<sup>+</sup> puncta decreased 7-fold in MS-DM hippocampi ( $P < 0.01$ ,  
484 **Fig. 2**). Similar changes in gephyrin<sup>+</sup> postsynaptic elements were observed in the CA2 of  
485 MS-M cases (6.6-fold decrease in MS-M vs NNCs,  $P < 0.01$ ), whereas no changes were  
486 observed in PSD95<sup>+</sup> postsynaptic elements of the CA2 of MS-M cases (**Fig. 2**). These  
487 findings indicate a gain of excitatory postsynaptic elements and a concomitant loss of  
488 inhibitory postsynaptic elements in the CA2 subfield of the MS hippocampus. Furthermore,  
489 they suggest that changes in inhibitory but not excitatory CA2 postsynaptic elements may  
490 precede demyelination in MS.

491

#### 492 **C1q deposits correlate with synaptic changes in the CA2 subfield of the MS**

493 **hippocampus.** To determine whether there is a link between the density of C1q deposition  
494 and synaptic changes in the MS hippocampus, we next performed correlation analyses  
495 between the density of C1q staining and either the density of vGLUT1<sup>+</sup> or vGAT<sup>+</sup> or PSD95<sup>+</sup>  
496 or gephyrin<sup>+</sup> synapses determined in the same MS hippocampi. Combining the control,  
497 myelinated and demyelinated MS hippocampi, we found a significant correlation between the  
498 extent of C1q deposition and the density of vGLU1<sup>+</sup> synapses (Spearman correlation  
499 coefficient,  $r = 0.48$ ,  $P = 0.027$ ,  $n = 21$ ), as well as between the extent of C1q deposition and  
500 gephyrin<sup>+</sup> synapses (Spearman correlation coefficient,  $r = -0.47$ ,  $P < 0.029$ ,  $n = 22$ ),  
501 indicating an association between C1q, gain of excitatory synapse markers and loss of  
502 inhibitory synapses in the CA2 subfield of the MS hippocampus (**Fig. 2e**). Although the

503 extent of C1q deposition increased with decreasing vGAT<sup>+</sup> synapses ( $r = -0.28$ ) and with  
504 increasing PSD95<sup>+</sup> synapses ( $r = 0.28$ ), these associations did not significantly correlate ( $P =$   
505  $0.2$  for both, **Fig. 2e**). Taken together, these data demonstrate an association between C1q and  
506 synaptic reorganization in the CA2 hippocampal subfield of progressive MS donors.

507

508 **Enrichment of C1q in the dorsal CA2 subfield in the demyelinated hippocampus of**  
509 **cuprizone-fed mice.** To understand the role of myelin loss and determine the functional  
510 consequences of C1q-mediated synapse loss in the CA2 subfield we next investigated the  
511 hippocampus in the cuprizone mouse model [41, 42]. Sagittal slices were cut along the  
512 dorsal-to-ventral axis of the hippocampus of adult (4-months old) male mice and stained for  
513 myelin basic protein (MBP) and compared with age-matched mice treated with cuprizone  
514 (0.2% for 9 weeks, **Fig. 3a**). In the control hippocampus, MBP was densely distributed in the  
515 white-matter tracts (fimbria and alveus) and the perforant path. In addition, MBP was also  
516 observed throughout the intrahippocampal grey matter regions including CA3 and CA2 (**Fig.**  
517 **3a**). Consistent with previous studies with cuprizone [43-46], myelin was strongly reduced in  
518 the white matter regions including the alveus and fimbria and near completely lost in the  
519 intrahippocampal grey matter areas (**Fig. 3a**). This pattern of intrahippocampal myelin loss  
520 was highly reproducible across mice and observed along the entire dorsal-to-ventral  
521 hippocampal axis (**Supplementary Fig. 1**).

522 Immunofluorescence staining for C1q was performed in the same sections that were  
523 also stained for MBP. Consistent with previous reports [27, 47], in the control hippocampus  
524 low intensities of C1q immunoreactivity was already detected specifically within the CA2  
525 subfield and the molecular layer of the dentate gyrus (DG) (CA2 and DG o.m.l., **Fig 3b**),  
526 Following cuprizone feeding, however, C1q immunoreactivity increased widely across the  
527 intrahippocampal grey matter and parahippocampal white-matter regions (on average 7.8-  
528 fold,  $P < 0.0001$ , **Fig 3b, c**). Quantitative immunofluorescence analysis across the different  
529 hippocampal subfields showed that average C1q intensities were significantly higher in CA2  
530 compared to CA1, CA3 and the DG (**Fig. 3c**). Furthermore, the cuprizone-induced  
531 upregulation of C1q followed a gradient along the longitudinal axis with the highest  
532 expression level in the dorsal region, lower in the intermediate region and undetectably low  
533 in the ventral hippocampus (**Supplementary Fig. 1a-d**). To further investigate the prominent  
534 CA2 localization of C1q in the demyelinated hippocampus, we stained hippocampal slices  
535 from control and cuprizone-fed mice with RGS14, a specific molecular marker for CA2  
536 pyramidal neurons [48]. Co-staining for RGS14 and C1q showed that C1q was



537 predominantly clustered in the stratum pyramidale and oriens of RGS14<sup>+</sup> neurons at  
538 significantly higher intensities when compared to the stratum lucidum, radiatum and  
539 lacunosum moleculare (**Fig. 3d, e**). Interestingly, a few RGS14<sup>-</sup> neurons in CA2, presumably  
540 interneurons, also showed perisomatic C1q (**Fig. 3d, e**).

541 Thus, in accordance with the demyelinated MS hippocampus (**Fig. 1**) C1q localization  
542 is highly circuit specific (CA2) and cuprizone-induced demyelination causes a strong  
543 enrichment around the CA2 pyramidal (RGS14<sup>+</sup>) neurons.

544

545 In the MS hippocampus (**Fig. 1** and [28]), models of neurodegeneration [22] and EAE  
546 models of demyelination[16] some C1q expression is already detectable before overt signs of  
547 pathology or myelin loss. We thus next asked whether the increase in C1q deposition at CA2  
548 precedes or follows the loss of myelin in this region. We quantified the extent of C1q  
549 immunoreactivity in relation to MBP immunoreactivity in the CA2 subfield throughout the  
550 course of cuprizone feeding (up to 6 weeks). The C1q immunoreactivity increased about 2-  
551 fold from baseline levels at 2 weeks of cuprizone feeding and reached its maximum around 4  
552 weeks. These changes in C1q were mirrored by a loss of MBP immunoreactivity in the CA2  
553 subfield with levels rapidly decreasing by 2-fold at 2 weeks of cuprizone feeding and  
554 reaching maximum loss around 6 weeks (**Supplementary Fig. 2a, b**). Correlation analysis  
555 showed a significant negative correlation for the CA2 stratum pyramidale layer ( $r = -0.66$ ,  $P$   
556  $< 0.0001$ , **Supplementary Fig. 2c**) supporting a link between the loss of myelin and the C1q  
557 increase in CA2 in this model.

558 Since a classical role of C1q is to tag antigen/(auto)antibody complexes for  
559 elimination[49], and anti-myelin antibodies are detected in serum of models of  
560 (auto)antibody-mediated demyelination[50], we next examined whether cuprizone-induced  
561 upregulation of C1q in CA2 was associated with serum titers of anti-myelin antibodies at the  
562 time when we detect myelin loss in the hippocampus. To test this, we measured anti-myelin  
563 oligodendrocyte glycoprotein (MOG) antibody levels in serum from these mice throughout  
564 the 6 weeks of cuprizone feeding as well as C57BL/6 mice immunized with human  
565 recombinant MOG (hMOG) protein as a technical positive control because hMOG-  
566 immunized C57BL/6 mice generate anti-MOG IgG antibodies that are required for the  
567 manifestation of clinical disease[50]. As expected, anti-MOG IgG titers were detected in  
568 hMOG-immunized C57BL/6 mice. In addition, anti-MOG IgG titers were very low or not  
569 detected in control mice (as expected) or cuprizone-fed mice throughout the 6 weeks of  
570 cuprizone feeding, including time points when myelin loss is evident (**Supplementary Fig.**

571 **2d**). These findings indicate that anti-MOG antibodies are not required for the observed  
572 demyelination and are unlikely to be the trigger of C1q upregulation in tissue. In summary  
573 we show that in the mouse hippocampus, cuprizone feeding triggers a circuit- and cell-  
574 specific increase in C1q immunoreactivity that is strongly linked with demyelination but is  
575 independent of anti-MOG antibodies, suggesting an antibody-independent role of C1q in the  
576 CA2 hippocampal subfield.

577

578 **Gain of excitatory synapses but loss of inhibitory synapses in the CA2 hippocampal**  
579 **subfield.**

580 The perisomatic clustering of C1q in CA2 stratum pyramidale caused by cuprizone-induced  
581 demyelination is strikingly consistent with the observations in the human MS hippocampus  
582 (**Fig. 1**). To determine the specific synaptic changes in the demyelinated CA2 we used double  
583 immunofluorescence staining for RGS14 (to identify CA2) in combination with synaptic  
584 markers that identify either glutamatergic synapse including the postsynaptic protein Homer1  
585 and the presynaptic vGLUT1 and vGLUT2 (**Fig. 4a**) or vGAT (**Fig. 4b**). Quantification of  
586 puncta within CA2 revealed a significant increase in the density of excitatory (vGLUT1<sup>+</sup>,  
587 vGLUT2<sup>+</sup> and Homer1<sup>+</sup>) synapses and a concomitant significant reduction in the density of  
588 inhibitory (vGAT<sup>+</sup>) synapses (**Figs. 4a-c**). Notably, unlike the vGLUT1 puncta, which were  
589 widely distributed in strata radiatum and oriens, the vGAT<sup>+</sup> synapses were clustered in the  
590 strata oriens and pyramidale, where the highest immunoreactivity for C1q was present and  
591 vGAT<sup>+</sup> synapses apparently contacted CA2 pyramidal neuron cell bodies (**Figs. 4b**). To  
592 examine whether C1q localizes at synapses in the CA2 region during cuprizone-induced  
593 demyelination we performed triple labelling for C1q, RGS14 and synapse markers. We found  
594 that compared to controls, cuprizone treatment significantly increased C1q<sup>+</sup>/vGLUT2<sup>+</sup> and  
595 C1q<sup>+</sup>/vGAT<sup>+</sup> synaptic contacts, but not C1q<sup>+</sup>/vGLUT1<sup>+</sup> synapses (**Fig. 4d-f**). Population  
596 analysis showed that there was a significant >3-fold increased probability that vGLUT2 and  
597 vGAT synapses were in contact with C1q and arranged similarly around the CA2 soma (**Fig.**  
598 **4d-f**).

599 Since activation of the classical complement pathway, initiated by the binding of C1q  
600 to its target, results in activation of the downstream complement component C3, and since C3  
601 has been involved in elimination of synapses during development [18] and in the MS visual  
602 thalamus [16], we next investigated whether also C3 activation products, like C1q, are  
603 deposited at synapses in the cuprizone hippocampus. Immunofluorescence staining for the  
604 membrane bound product of C3 activation, C3d, showed a significant 1.8-fold increase in

605 C3d deposits in CA2 of cuprizone mice compared to controls. Interestingly, C3d co-localized  
606 with GFAP<sup>+</sup> astrocytes (**Fig. S3a, b**), which may reflect the neurotoxic A1 type of astrocytes  
607 previously described in MS tissue [51]. C3d also co-localized with some synapses, however  
608 the amount of C3d<sup>+</sup> synapses did not vary between cuprizone and control mice (**Fig. S3c, d**).  
609 Finally, immunogold electron microscopy (EM) for C1q protein confirmed that C1q is  
610 present at a low density in control CA2 subfield [27] but strongly increased throughout the  
611 extracellular spaces and matrix, often in close proximity to presynaptic terminals (**Fig. 4g**).  
612 Together, these data suggest that cuprizone feeding may cause a C1q-mediated  
613 reorganization of synapses in the CA2 pyramidal and oriens layers.

614

615 **C1q-tagged synapses localize within microglia/macrophages in the CA2 hippocampal**  
616 **subfield during cuprizone-induced demyelination.** Complement-tagged synapses are  
617 eliminated via phagocytoses by microglia during development, adulthood, normal ageing,  
618 neurodegeneration and demyelination of the visual thalamus [16, 18, 22, 26, 27]. To test  
619 whether microglia/macrophages engulf C1q-tagged synapses in CA2, we first quantified  
620 changes in the number of cells positive for ionized calcium-binding adaptor molecule 1 (Iba-  
621 1), a marker for microglia/macrophages. Quantification of Iba-1<sup>+</sup> cells in CA2 showed a  
622 significant 2-fold increase in number as well as a significant 3-fold increase in the area  
623 covered by the Iba-1<sup>+</sup> cells in the cuprizone-treated mice compared to controls (**Fig. 5a, b**).  
624 Double immunofluorescence labeling of Iba-1 with either Homer 1, vGLUT1, vGLUT2 or  
625 vGAT showed a basal level of co-localization of Iba-1 with each of the synaptic markers in  
626 the control hippocampus, likely reflecting ongoing surveillance of microglia. However,  
627 cuprizone feeding induced a specific increase in Iba-1<sup>+</sup>/vGLUT2<sup>+</sup> and Iba-1<sup>+</sup>/vGAT<sup>+</sup>  
628 synapses (**Fig. 5c-e**). 3D rendering also showed microglial/macrophage processes  
629 surrounding synapses (see example of vGAT<sup>+</sup> synapse in **Fig. 5d**), pointing to the engulfment  
630 of synaptic elements by myeloid cells in the CA2 area. In line, immunogold-EM for C1q  
631 protein in cuprizone-fed mice showed thick microglial processes engulfing electrodense  
632 element in close proximity to synapses (**Fig. 5f**) or touching C1q labeled synapses in the CA2  
633 hippocampal subfield (**Fig. 5g**), further supporting the close association and engulfment of  
634 synaptic elements by myeloid cells in the CA2 area.

635

636 **Reduced feedforward inhibition of CA2 pyramidal neurons.** What are the functional  
637 consequences of microglia/macrophages phagocytosed and C1q-tagged synapses for  
638 information processing in the CA2 circuit? The CA2 PNs receive a strong excitatory drive

639 from layer 2 medial and lateral entorhinal cortex pyramidal neurons at their distal dendrites in  
640 the lacunosum moleculare but weak excitation from the DG mossy-fibers at the proximal  
641 dendrites [35, 52-54]. In the stratum pyramidale and oriens layers, where C1q  
642 immunoreactivity was markedly increased (**Figs. 4 and 5**), vGLUT2 reflects glutamatergic  
643 innervation from the medial septum diagonal band complex and the hypothalamic  
644 supramammillary nucleus [55, 56], whereas the vGAT are predominantly from fast-spiking  
645 parvalbumin (PV)<sup>+</sup> interneurons producing feedforward inhibition from the CA3 Schaffer  
646 collateral (SC) axons [53, 54, 57, 58] (**Fig. 6a**). The CA2 PV<sup>+</sup> interneurons are furthermore  
647 subjected to neuromodulation from the hypothalamic paraventricular nucleus (PVN) and  
648 supraoptic nucleus (SON), playing a critical role in encoding social learning by affecting  
649 plasticity of PV interneurons [57-59]. To test whether loss of vGAT synapses causes  
650 functional changes in the local inhibitory circuit of CA2 we electrically stimulated SC axons  
651 while recording in whole-cell patch-clamp configuration from CA2 PN somata in transverse  
652 slices from the dorsal hippocampal region from control and cuprizone-fed mice (6 weeks for  
653 0.2% cuprizone, **Fig. 6a**). All recorded neurons were simultaneously filled with biocytin and  
654 post-hoc stained with RGS14 or PCP4. About 80% of the recorded neurons ( $n = 29/36$ ) were  
655 unequivocally CA2 pyramidal neurons and included for further analysis for their properties.

656 In PNs in control slices, SC activation produced a brief depolarization followed by a  
657 strong inhibitory potential (**Fig. 6a,b**, [52]). A single brief SC stimulus was examined with  
658 varying levels of output voltage (0 to 90 V). The depolarizing peak of the postsynaptic  
659 potential (PSP) did not differ between the two groups across the range of stimuli (mixed-  
660 effect ANOVA Treatment  $F_{9,171} = 0.688$ ,  $P = 0.548$ , at 90 V; control PSP amplitude,  $3.20 \pm$   
661  $0.59$  mV,  $n = 12$ , vs. cuprizone PSP  $4.04 \pm 0.64$ ,  $n = 9$ , **Fig. 6b**, data not shown). To  
662 distinguish between the monosynaptic glutamate receptor and disynaptic GABAergic  
663 receptor activation in the Schaffer collateral pathway we applied CGP 35348 (antagonist of  
664 GABA<sub>B</sub> receptors, 20  $\mu$ M) and gabazine (SR 95531, a selective GABA<sub>A</sub> antagonist, 3  $\mu$ M).  
665 Analysis of the remaining EPSP revealed that SC activation in cuprizone-treated mice  
666 produced similar peak amplitudes across the entire range of stimuli (mixed-effect RM  
667 ANOVA, Treatment  $P = 0.809$ , **Figs. 6b, c**). In contrast, the IPSP peak amplitudes  
668 (subtracting the control PSP with the EPSP), were significantly reduced in a stimulus-  
669 dependent manner (**Figs. 6b, c**). Calculating the relative contribution within experiments  
670 (EPSP/IPSP amplitude ratios) confirmed a significant loss of inhibition of CA2 PNs from  
671 cuprizone-treated mice (control ratio,  $0.64 \pm 0.06$  versus cuprizone ratio  $1.11 \pm 0.15$ , two-  
672 tailed Mann-Whitney test  $U = 7$ ,  $P = 0.0064$ ,  $n = 8$  neurons from 6 mice/group). About ~80%

673 of the GABAergic cells in the CA2 stratum pyramidale layer are parvalbumin-positive (PV<sup>+</sup>)  
674 interneurons[60]. To test whether the reduced feedforward inhibition is mediated by cell loss  
675 we counted the number of PV<sup>+</sup> interneurons in the CA2 region using double  
676 immunofluorescence staining with PV and RGS14. The results, however, showed no  
677 evidence for a change in PV<sup>+</sup> interneuron density in the demyelinated hippocampus  
678 (**Supplementary Fig. 4**).

679 Together, the data suggest that feedforward inhibition is impaired while glutamatergic  
680 excitation is maintained, in part consistent with the C1q-tagged and microglia/macrophage  
681 stripped vGAT<sup>+</sup> release sites (**Figs. 4,5**).

682 The cuprizone-induced switch from a net feedforward inhibition to excitation was  
683 prominently visible when stimulating SCs with a burst (5 stimuli @100 Hz, in physiological  
684 extracellular solution, **Fig. 6d**). In control CA2 PNs, the PSP peak amplitudes summated  
685 highly sublinear and the 5<sup>th</sup> peak potential amplitude was on average ~5 mV more  
686 hyperpolarized relative to the first peak potential due to slow inhibitory potentials [52]  
687 whereas after cuprizone treatment the PSP peak amplitudes summated and increased by ~1  
688 mV relative to the first peak (**Fig. 6d**). The strong feedforward inhibitory drive from CA3  
689 typically limits CA2 spike output and in accordance APs were only observed in 2/14 control  
690 CA2 PNs at the maximum strength of 90 V (on average  $0.5 \pm 0.43$  APs, **Fig. 6e**). A similar  
691 low probability for spike output of CA2 PNs was noted in cuprizone treated mice (1/10  
692 recordings, on average  $0.22 \pm 0.22$  APs, mixed-effect ANOVA, Treatment  $F_{9,207} = 0.297$ ,  $P =$   
693  $0.975$ , **Fig. 6e**). As expected GABA<sub>A/B</sub> block, in control CA2 PNs a larger number of APs  
694 were evoked with SC stimulation (> 6 APs from 30 V, **Fig. 6e**). In striking contrast, however,  
695 following cuprizone treatment CA2 PNs showed in comparison to controls PNs a ~3-fold  
696 lower spike output rate (**Fig. 6e**). Thus, despite the lower dynamic range in CA2 feedforward  
697 inhibition, the glutamate-mediated synaptic drive from CA3 neurons in the demyelinated  
698 hippocampus produces only a weak spike output.

699

700 **Reduced excitability of CA2 pyramidal neurons.** To test whether the synaptic changes are  
701 accompanied by morphological changes of CA2 PNs we analyzed the current-clamp  
702 recordings and post-hoc reconstructed RGS14<sup>+</sup> or PCP4<sup>+</sup> neurons (**Fig. 7a**). The total  
703 RGS14<sup>+</sup> area (stratum pyramidale and oriens) was not different following cuprizone  
704 treatment (**Supplementary Fig. 4**). Detailed reconstructions of biocytin-filled CA2  
705 pyramidal neurons showed that the total dendritic length was not different (control,  $4.28 \pm$   
706  $0.75$  mm,  $n = 5$  vs. cuprizone  $3.28 \pm 0.58$  mm,  $n = 6$ , Mann-Whitney test  $U = 9$ ,  $P = 0.329$ ).

707 However, Scholl analysis showed that cuprizone treatment was associated with a  
708 significantly redistribution of dendritic branches, with a lower number in the lacunosum  
709 moleculare, reflecting possibly dendritic atrophy and loss of input sites from the enthorinal  
710 cortex ( $P < 0.0001$ , **Fig. 7b**). When using depolarizing current injections in the soma, PNs  
711 showed the characteristic delay in spike generation typical as described for CA2 PNs  
712 previously [52]. The resting membrane potentials were not different (control,  $-81.4 \pm 2.0$   
713 mV,  $n = 13$  versus  $-82.6 \pm 1.2$ ,  $n = 11$ , unpaired t-test  $P > 0.60$ ) but the maximum firing rate  
714 was lower in CA2 PNs from cuprizone-treated mice (**Fig. 7c**). The minimum current to evoke  
715 AP generation was, however, not different between groups (Mann-Whitney test  $U = 51$ ,  $P =$   
716  $0.565$ ,  $n = 10$  cuprizone and 12 control neurons, 5 mice/group). Interestingly, the sag ratio, as  
717 measured by the degree of depolarization upon hyperpolarization steps to  $-110$  mV revealed  
718 that CA2 PNs from cuprizone-treated animals exhibited significantly increased depolarizing  
719 amplitudes, suggesting an increased dendritic hyperpolarization-activated cyclic nucleotide-  
720 gated (HCN) conductance (**Fig. 7d**). These changes were not associated with the expected  
721 reduction in neuronal input resistance (unpaired t-test  $P > 0.72$ , **Fig. 7e**). Finally, detailed  
722 analysis of single APs showed that most properties were similar except the first rate-of-rise  
723 component, reflecting the local axonal charging of the spike[61], which significantly  
724 decreased by on average  $\sim 100 \text{ V s}^{-1}$  in cuprizone-treated mice (**Fig. 7f**). Taken together, these  
725 data suggest that increased dendritic resting conductance, decreased dendritic surface area  
726 and reduced spike generation at the axonal output site limits spike output from CA2  
727 pyramidal neurons.

728  
729 **Social memory is impaired by cuprizone treatment.** The dorsal CA2 area receives unique  
730 subcortical inputs signaling emotional states and is a circuit for social memory formation  
731 [32], mediated by suppressing the PV-mediated feedforward inhibition and gating CA2  
732 output to the ventral CA1 area [32, 57, 62]. Previous studies showed that cuprizone treatment  
733 increases social behaviors in a resident-intruder paradigm, but negatively impacts on complex  
734 motor tasks and hippocampal-dependent spatial learning [45, 63]. To investigate directly  
735 whether the CA2-mediated encoding of social memory is affected we used the five-trial  
736 social memory test [32]. The results showed that cuprizone significantly affected social  
737 memory (two-way RM ANOVA  $F_{1,20} = 13.7$ ,  $P = 0.0014$ ,  $n = 11$  mice/group, **Fig. 8**). Whereas  
738 control mice significantly reduced the time investigating the familiar conspecific, indicating  
739 social memory, they dishabituated when confronted with a novel mouse (Bonferroni's  
740 multiple comparison tests Trials 2–4,  $P < 0.034$ , **Fig. 8**, [Supplementary Movie S1](#)). In

741 contrast, cuprizone treatment for seven weeks caused a lack of habituation (Bonferroni's  
742 multiple comparison tests for Trials 2–4 versus Trial 1,  $P > 0.60$ ,  $n = 11$ , **Fig. 8**,  
743 [Supplementary Movie S2](#)), and neither did mice dishabituated with a novel mouse ( $P >$   
744  $0.999$ , Trial 5 vs Trial 1,  $n = 11$ , **Fig. 8**).

745 To test whether cuprizone-treated mice experience general deficits in motor activities  
746 or other learning tasks, not involving social memory, we used the PhenoTyper which for a  
747 continuous period of 16 hours automatically monitored mice for locomotion and spatial  
748 exploration. In addition, individually housed mice engaged in a cognition wall monitoring a  
749 discrimination learning task in which food pellets were provided as a reward [64]. Analysis  
750 of the general behavior showed that control and cuprizone-treated mice exhibited similar  
751 levels of exploration, were spending equal amounts of time outside the shelter box and  
752 moved similar distances in the cage across the 16 hours of recording (**Supplementary Fig.**  
753 **4**). Interestingly, cuprizone-treated mice showed a higher preference for the left port, learning  
754 the food-reward discrimination more accurate and faster ( $P < 0.0001$ , **Fig. 8** and  $P < 0.0001$ ,  
755 **Supplementary Fig. 5**, respectively).

756 Together, the findings indicate that cuprizone-induced demyelination causes deficits in  
757 learning in specific domains and, in line with the impaired CA2 inhibitory circuit, social  
758 cognition was found to be impaired.

759

760

## 761 **Discussion**

762 In this study we identified the CA2 hippocampal subfield as a common target for C1q-  
763 associated loss of inhibitory synapses both in the MS hippocampus and cuprizone-induced  
764 demyelination. Using post-mortem MS tissue collected at rapid autopsy we found that C1q is  
765 most prominently increased in CA2, associated with a loss of vGAT<sup>+</sup> synapses and its  
766 upregulation correlated with cognitive deficits. Although extremely valuable, the human MS  
767 post-mortem hippocampal tissue offers only an endpoint snapshot of a complex pathological  
768 cascade. Animal models which reproduce the synaptic alterations seen in MS are a  
769 prerequisite to elucidating the mechanisms and functional consequences of hippocampal  
770 changes. While acute EAE models reflect the contribution of acute inflammation to  
771 pathology [65], dietary cuprizone feeding in mice induces hippocampal demyelination with  
772 little inflammatory lesions [41, 42], resembling some of the histopathological presentations of  
773 grey matter lesions in MS patients [13]. Using both EM and confocal microscopy in the  
774 hippocampus of the cuprizone model of demyelination, we showed that C1q was selectively

775 enriched at vGLUT2<sup>+</sup> and vGAT<sup>+</sup> synapses, which were engulfed by microglial processes  
776 resulting in a substantial reduction in the number of only GABAergic terminals in the stratum  
777 pyramidale and oriens of CA2. That GABAergic synapses are specifically tagged by C1q,  
778 engulfed and eliminated by microglia independently of anti-MOG antibodies in the cuprizone  
779 model, disconnects the process of C1q-mediated elimination of synapses from the classical  
780 role of C1q as recognition molecule of T-cell mediated antigen/antibody complexes that  
781 typically occurs in autoimmune diseases as part of the inflammatory response. This is in line  
782 with the current knowledge that MOG-antibody associated demyelinating disease is different  
783 from MS and cortical demyelination in MS occurs independent of anti-MOG antibodies [66].  
784 Nonetheless, the association between the density of C1q protein localized in CA2 and the  
785 amount of MBP reduction in this region, in mice (**Supplementary Fig. 2c**) and in MS (**Fig.**  
786 **7c**), may suggest that C1q-mediated processes are at least concomitant to myelin loss. Indeed,  
787 in the cuprizone model myelin debris itself suffices to activate Iba-1<sup>+</sup> microglia/macrophages  
788 and causes hypertrophy of GFAP<sup>+</sup> astrocytes in grey matter regions [67]. On the other hand,  
789 the process of microglia-mediated elimination of C1q-tagged synapses is reminiscent of  
790 observations during early development [18], adulthood [26], normal ageing [27] and  
791 neurodegeneration [22], all of which are conditions that do not involve demyelination,  
792 indicating that C1q-mediated elimination of synapses may also be an event independent of  
793 demyelination.

794         Recent work from Werneburg et al. [16] showed that synaptic material is tagged by  
795 complement C3 (not by C1q) and is engulfed by microglia in the retinogeniculate system of  
796 models of demyelination and in the visual thalamus of MS patients before onset of clinical  
797 disease and before overt signs of demyelination. In contrast to that study [16], we found that  
798 C1q but not C3 is deposited at discrete synapses that are engulfed by microglia in the MS and  
799 cuprizone hippocampus, suggesting that different complement pathways may be at play in  
800 different neural circuits in the mouse and human brain. Although we also observed a higher  
801 density of C3d in the CA2 hippocampal subfield of cuprizone mice compared to controls, this  
802 complement complex mainly localized at GFAP<sup>+</sup> astrocytes. This is consistent with recent  
803 work showing that microglia-derived C1q (together with IL-1 $\alpha$  and TNF) induce astrocytes  
804 to transition to a more reactive phenotype, including induction of astrocytic C3[51].  
805 Interestingly, in the demyelinated CA2 region and within the stratum pyramidale and oriens  
806 layers, C1q specifically targets and eliminates vGLUT2<sup>+</sup> and vGAT<sup>+</sup> synapses but not  
807 Homer1<sup>+</sup> or vGLUT1<sup>+</sup> synapses. Whilst the vGLUT1 and Homer1 synapse markers were



808 strongly increased across intrahippocampal regions (in cuprizone and MS hippocampi) our  
809 whole-cell recordings for Schaffer-collateral responses did not show a change in EPSP input  
810 strength. Interestingly, a recent study showed that Schaffer collateral field responses in CA1  
811 reduce in amplitude in the first weeks of cuprizone feeding [68]. The discrepancies between  
812 functional recordings and glutamatergic synapse markers remain to be further investigated.  
813 One possibility is that the upregulation in these pre- and postsynaptic proteins are non-  
814 neuronal and represent reactive astrocytes. An upregulation of Homer1 also is seen in  
815 reactive astrocyte types that switches astroglial signalling pathways during inflammatory  
816 conditions [69].

817 An important question that arises from these findings is what molecular and/or  
818 activity-dependent mechanisms determine which synapses are targeted and which are spared  
819 by C1q? At the molecular level, a recent study in the retinogeniculate system demonstrated  
820 that a “don’t eat me” signal, such as CD47, is required to prevent excess pruning of synapses  
821 during development [70]. CD47 could directly inhibit phagocytosis by binding to its receptor,  
822 SIRP $\alpha$ , on microglia/macrophages [71, 72] and it has also been shown to prevent engulfment  
823 of cells opsonized with “eat me” flags, such as complement, showing that it can override  
824 these signals [73]. In addition, C1q was copurified with synaptosomes containing markers of  
825 apoptosis [74], suggesting that synaptic pruning may involve some of the same molecular  
826 triggers as the complement-mediated enhanced clearance of apoptotic cells that occurs as part  
827 of a homeostatic (non-phlogistic) process in the periphery [24]. Whether “don’t eat me”  
828 signals on spared synapses or “eat me” (i.e. apoptotic) signals on tagged synapses are  
829 involved in the engulfment of complement-tagged inhibitory synaptic elements in the rodent  
830 and/or MS demyelinated hippocampus remains to be determined. One additional mechanisms  
831 by which RGC synapses are eliminated during development involves neuronal activity, with  
832 microglia engulfing less active RGC inputs [19], in line with the knowledge that less active  
833 or ‘weaker’ inputs are pruned and lose territory as compared to those inputs that are  
834 ‘stronger’ or more active, which elaborate and strengthen [75]. The changes in ascending and  
835 descending inputs from the hippocampus as well as the intrahippocampal activity remains the  
836 be further examined.

837

### 838 *Functional reorganization of demyelinated intrahippocampal circuits.*

839 In the cuprizone model the loss of GABAergic terminals was not limited to specific  
840 CA subfields but more widespread. Indeed, cuprizone treatment affects besides the CA2-  
841 mediated social memory (this study, **Fig. 6**) also spatial navigation [45], typically mediated

842 by synaptic plasticity in the CA1 and CA3 areas in the dorsal hippocampus in rodents[8].  
843 Although CA2 represents only a small region of the CA pyramidal layer, emerging evidence  
844 points to CA2 as an hippocampal area that is genetically, molecularly and physiologically  
845 unique and acts as a hub controlling subcortical and intrahippocampal information  
846 processing[36], and could represent a novel target for therapeutic treatment [76]. Unlike CA1  
847 and CA3, the CA2 PNs receive strong long-range extrahippocampal and input from both  
848 layer 2 medial and lateral entorhinal cortex pyramidal neurons at their distal dendrites [35,  
849 52-54] and direct vGLUT2-mediated inputs from the medial septum diagonal band complex  
850 and the supramammillary nucleus [55, 56]. Whether the myelin loss from excitatory long-  
851 range projections cause impairments in the temporal structure of activity in CA2 needs to be  
852 determined by using *in vivo* recordings and cell-selective optogenetic approaches. Data on the  
853 electrophysiological consequences of myelin loss in the hippocampus is scarce. Recent  
854 longitudinal *in vivo* Ca<sup>2+</sup> imaging of CA1 PNs over the course of 7 weeks cuprizone  
855 treatment reported a neuronal hypo-excitability, rapidly recovering during remyelination [68].  
856 In contrast, using EEG recordings Hoffmann et al. [77], reported large-amplitude seizure  
857 activity in the hippocampus after 9 weeks of cuprizone treatment in awake and freely moving  
858 mice. The present finding of an impaired inhibitory circuit in the CA2 subregion (**Fig. 4**)  
859 could provide a cellular mechanism giving rise to hippocampal seizure activity. Consistent  
860 with this conjecture, Boehringer and colleagues [53] showed that the CA2 region acts as a  
861 central hub to balance excitation and inhibition across CA1 and CA3 areas. Using  
862 chemogenetic silencing of the CA2 neurons transformed sharp-wave ripple activity into  
863 seizure-like discharges [53]. Such widespread synchronization of inhibitory activity may in  
864 part be dependent on the strong feedforward inhibition by fast-spiking CA2 interneurons. The  
865 CA2 region contains a high density of PV<sup>+</sup> interneurons [60, 78] with a unique morphology  
866 and mid-range axonal projections targeting CA1 and CA3 pyramidal layers. Interestingly, a  
867 large fraction of the intrahippocampal myelination represents sheaths that are wrapped  
868 around GABAergic interneuron axons, mostly including the PV<sup>+</sup> axons [78, 79]. Whether  
869 PV<sup>+</sup> interneuron excitability changes with demyelination and what triggers C1q upregulation  
870 to prune GABAergic release sites is not well understood but is an important area for further  
871 research.

872

### 873 *A role of CA2 circuits in cognitive impairments?*

874 The importance of anatomical parcellation and functional subspecialization of the  
875 hippocampal subfields in cognitive problems in MS had already been brought forward by

876 diffusion tensor MRI studies of atrophy and connectivity in MS [80]. For example, CA1  
877 atrophy is a prediction for verbal memory performance [9, 10, 81], while CA2/3 atrophy  
878 underlies depressive symptoms [11], and changes in the dentate gyrus enlargement may  
879 explain poor cognitive performance[82]. The subcortical areas with which the CA2  
880 pyramidal neurons and interneurons are connected with are involved in emotional regulation  
881 and include the hypothalamus, amygdala and septum. To what extent the CA2 connectivity  
882 and the local PV interneurons are affected in MS and whether its role in social memory  
883 consolidation is homologous to rodent is unknown and remains to be further examined with  
884 high-resolution MRI imaging enabling the parcellation of small CA2 area and by performing  
885 further detailed molecular analysis of area CA2 in the postmortem brain. The idea that CA2  
886 in the human hippocampus is critical to cognition is, however, supported by a meta-analysis  
887 of post-mortem studies, revealing that PV<sup>+</sup> interneuron loss specifically within the CA2 is  
888 one the strongest predictors for schizophrenia and mood disorders [83]. Both social cognition  
889 and facial emotion recognition, have been identified as domains that are affected in MS  
890 patients and associated with reduced social activities and a burden for the quality of life [5,  
891 6]. Social cognition steers the ability to interpret and interact with the mental states of others  
892 and is a core psychological skill to maintain relationships and social support. This capacity is  
893 of crucial important for people with MS to mitigate the disease and recent studies showed  
894 that a decline in social cognitive skills negatively impacts on the quality of the life for MS  
895 patients. Our findings of a disrupted inhibitory CA2 circuit related to impaired memory for  
896 conspecifics in the demyelinated hippocampus resemble the changes in CA2 seen when  
897 deleting the psychiatric-disease related gene 22q11.2 causing also an impaired CA3 to CA2  
898 feedforward mediated inhibition as well as a reduced CA2 PN spike output resulting in an  
899 impaired social memory [59]. Altogether, our work adds to the emerging evidence of  
900 subspecialization of the hippocampal subfields in specific cognitive domains which may also  
901 help explain subfield-specific susceptibility to injury in MS.

## References

1. Chiaravalloti ND, and DeLuca J (2008) Cognitive impairment in multiple sclerosis. *Lancet Neurol* 7(12):1139-51.
2. Fisniku LK, Chard DT, Jackson JS, Anderson VM, Altmann DR, Miszkiel KA, et al. (2008) Gray matter atrophy is related to long-term disability in multiple sclerosis. *Ann Neurol* 64(3):247-54.
3. Feuillet L, Reuter F, Audoin B, Malikova I, Barrau K, Cherif AA, et al. (2007) Early cognitive impairment in patients with clinically isolated syndrome suggestive of multiple sclerosis. *Mult Scler* 13(1):124-7.
4. Pottgen J, Dziobek I, Reh S, Heesen C, and Gold SM (2013) Impaired social cognition in multiple sclerosis. *J Neurol Neurosurg Psychiatry* 84(5):523-8.
5. Golde S, Heine J, Pottgen J, Mantwill M, Lau S, Wingenfeld K, et al. (2020) Distinct Functional Connectivity Signatures of Impaired Social Cognition in Multiple Sclerosis. *Front Neurol* 11:507.
6. Cotter J, Firth J, Enzinger C, Kontopantelis E, Yung AR, Elliott R, et al. (2016) Social cognition in multiple sclerosis: A systematic review and meta-analysis. *Neurology* 87(16):1727-36.
7. Squire LR, Stark CE, and Clark RE (2004) The medial temporal lobe. *Annu Rev Neurosci* 27:279-306.
8. Schafer M, and Schiller D (2018) Navigating Social Space. *Neuron* 100(2):476-89.
9. Sicotte NL, Kern KC, Giesser BS, Arshanapalli A, Schultz A, Montag M, et al. (2008) Regional hippocampal atrophy in multiple sclerosis. *Brain* 131(Pt 4):1134-41.
10. Longoni G, Rocca MA, Pagani E, Riccitelli GC, Colombo B, Rodegher M, et al. (2015) Deficits in memory and visuospatial learning correlate with regional hippocampal atrophy in MS. *Brain Struct Funct* 220(1):435-44.
11. Gold SM, Kern KC, O'Connor MF, Montag MJ, Kim A, Yoo YS, et al. (2010) Smaller cornu ammonis 2-3/dentate gyrus volumes and elevated cortisol in multiple sclerosis patients with depressive symptoms. *Biol Psychiatry* 68(6):553-9.
12. Gold SM, O'Connor MF, Gill R, Kern KC, Shi Y, Henry RG, et al. (2014) Detection of altered hippocampal morphology in multiple sclerosis-associated depression using automated surface mesh modeling. *Hum Brain Mapp* 35(1):30-7.
13. Geurts JJ, Bo L, Roosendaal SD, Hazes T, Daniels R, Barkhof F, et al. (2007) Extensive hippocampal demyelination in multiple sclerosis. *J Neuropathol Exp Neurol* 66(9):819-27.
14. Rocca MA, Barkhof F, De Luca J, Frisen J, Geurts JJG, Hulst HE, et al. (2018) The hippocampus in multiple sclerosis. *Lancet Neurol* 17(10):918-26.
15. Trapp BD, Wujek JR, Criste GA, Jalabi W, Yin X, Kidd GJ, et al. (2007) Evidence for synaptic stripping by cortical microglia. *Glia* 55(4):360-8.
16. Werneburg S, Jung J, Kunjamma RB, Ha SK, Luciano NJ, Willis CM, et al. (2020) Targeted Complement Inhibition at Synapses Prevents Microglial Synaptic Engulfment and Synapse Loss in Demyelinating Disease. *Immunity* 52(1):167-82 e7.
17. Peterson JW, Bo L, Mork S, Chang A, and Trapp BD (2001) Transected neurites, apoptotic neurons, and reduced inflammation in cortical multiple sclerosis lesions. *Ann Neurol* 50(3):389-400.
18. Stevens B, Allen NJ, Vazquez LE, Howell GR, Christopherson KS, Nouri N, et al. (2007) The classical complement cascade mediates CNS synapse elimination. *Cell* 131(6):1164-78.

19. Schafer DP, Lehrman EK, Kautzman AG, Koyama R, Mardinly AR, Yamasaki R, et al. (2012) Microglia sculpt postnatal neural circuits in an activity and complement-dependent manner. *Neuron* 74(4):691-705.
20. Howell GR, Macalinao DG, Sousa GL, Walden M, Soto I, Kneeland SC, et al. (2011) Molecular clustering identifies complement and endothelin induction as early events in a mouse model of glaucoma. *J Clin Invest* 121(4):1429-44.
21. Bialas AR, and Stevens B (2013) TGF-beta signaling regulates neuronal C1q expression and developmental synaptic refinement. *Nat Neurosci* 16(12):1773-82.
22. Hong S, Beja-Glasser VF, Nfonoyim BM, Frouin A, Li S, Ramakrishnan S, et al. (2016) Complement and microglia mediate early synapse loss in Alzheimer mouse models. *Science* 352(6286):712-6.
23. Vasek MJ, Garber C, Dorsey D, Durrant DM, Bollman B, Soung A, et al. (2016) A complement-microglial axis drives synapse loss during virus-induced memory impairment. *Nature* 534(7608):538-43.
24. Ricklin D, Hajishengallis G, Yang K, and Lambris JD (2010) Complement: a key system for immune surveillance and homeostasis. *Nat Immunol* 11(9):785-97.
25. Schafer DP, Lehrman EK, and Stevens B (2013) The "quad-partite" synapse: microglia-synapse interactions in the developing and mature CNS. *Glia* 61(1):24-36.
26. Wang C, Yue H, Hu Z, Shen Y, Ma J, Li J, et al. (2020) Microglia mediate forgetting via complement-dependent synaptic elimination. *Science* 367(6478):688-94.
27. Stephan AH, Madison DV, Mateos JM, Fraser DA, Lovelett EA, Coutellier L, et al. (2013) A dramatic increase of C1q protein in the CNS during normal aging. *J Neurosci* 33(33):13460-74.
28. Michailidou I, Willems JG, Kooi EJ, van Eden C, Gold SM, Geurts JJ, et al. (2015) Complement C1q-C3-associated synaptic changes in multiple sclerosis hippocampus. *Ann Neurol* 77(6):1007-26.
29. Seewann A, Kooi EJ, Roosendaal SD, Barkhof F, van der Valk P, and Geurts JJ (2009) Translating pathology in multiple sclerosis: the combination of postmortem imaging, histopathology and clinical findings. *Acta Neurol Scand* 119(6):349-55.
30. Popescu V, Klaver R, Voorn P, Galis-de Graaf Y, Knol DL, Twisk JW, et al. (2015) What drives MRI-measured cortical atrophy in multiple sclerosis? *Mult Scler* 21(10):1280-90.
31. Hamada MS, and Kole MH (2015) Myelin loss and axonal ion channel adaptations associated with gray matter neuronal hyperexcitability. *J Neurosci* 35(18):7272-86.
32. Hitti FL, and Siegelbaum SA (2014) The hippocampal CA2 region is essential for social memory. *Nature* 508(7494):88-92.
33. van den Pol AN, and Gorcs T (1986) Synaptic relationships between neurons containing vasopressin, gastrin-releasing peptide, vasoactive intestinal polypeptide, and glutamate decarboxylase immunoreactivity in the suprachiasmatic nucleus: dual ultrastructural immunocytochemistry with gold-substituted silver peroxidase. *J Comp Neurol* 252(4):507-21.
34. Kooi EJ, Prins M, Bajic N, Belien JA, Gerritsen WH, van Horssen J, et al. (2011) Cholinergic imbalance in the multiple sclerosis hippocampus. *Acta Neuropathol* 122(3):313-22.
35. Kohara K, Pignatelli M, Rivest AJ, Jung HY, Kitamura T, Suh J, et al. (2014) Cell type-specific genetic and optogenetic tools reveal hippocampal CA2 circuits. *Nat Neurosci* 17(2):269-79.
36. Dudek SM, Alexander GM, and Farris S (2016) Rediscovering area CA2: unique properties and functions. *Nat Rev Neurosci* 17(2):89-102.

37. Palomero-Gallagher N, Kedo O, Mohlberg H, Zilles K, and Amunts K (2020) Multimodal mapping and analysis of the cyto- and receptorarchitecture of the human hippocampus. *Brain Struct Funct* 225(3):881-907.
38. Wittner L, Huberfeld G, Clemenceau S, Eross L, Dezamis E, Entz L, et al. (2009) The epileptic human hippocampal cornu ammonis 2 region generates spontaneous interictal-like activity in vitro. *Brain* 132(Pt 11):3032-46.
39. Dutta R, Chang A, Doud MK, Kidd GJ, Ribaldo MV, Young EA, et al. (2011) Demyelination causes synaptic alterations in hippocampi from multiple sclerosis patients. *Ann Neurol* 69(3):445-54.
40. Papadopoulos D, Dukes S, Patel R, Nicholas R, Vora A, and Reynolds R (2009) Substantial archaeocortical atrophy and neuronal loss in multiple sclerosis. *Brain Pathol* 19(2):238-53.
41. Kipp M, Clarner T, Dang J, Copray S, and Beyer C (2009) The cuprizone animal model: new insights into an old story. *Acta Neuropathol* 118(6):723-36.
42. Praet J, Guglielmetti C, Berneman Z, Van der Linden A, and Ponsaerts P (2014) Cellular and molecular neuropathology of the cuprizone mouse model: clinical relevance for multiple sclerosis. *Neurosci Biobehav Rev* 47:485-505.
43. Baxi EG, DeBruin J, Jin J, Strasburger HJ, Smith MD, Orthmann-Murphy JL, et al. (2017) Lineage tracing reveals dynamic changes in oligodendrocyte precursor cells following cuprizone-induced demyelination. *Glia* 65(12):2087-98.
44. Sen MK, Almuslehi MSM, Coorssen JR, Mahns DA, and Shortland PJ (2020) Behavioural and histological changes in cuprizone-fed mice. *Brain Behav Immun* 87:508-23.
45. Dutta R, Chomyk AM, Chang A, Ribaldo MV, Deckard SA, Doud MK, et al. (2013) Hippocampal demyelination and memory dysfunction are associated with increased levels of the neuronal microRNA miR-124 and reduced AMPA receptors. *Ann Neurol* 73(5):637-45.
46. Norkute A, Hieble A, Braun A, Johann S, Clarner T, Baumgartner W, et al. (2009) Cuprizone treatment induces demyelination and astrogliosis in the mouse hippocampus. *J Neurosci Res* 87(6):1343-55.
47. Lopez ME, Klein AD, and Scott MP (2012) Complement is dispensable for neurodegeneration in Niemann-Pick disease type C. *J Neuroinflammation* 9:216.
48. Evans PR, Lee SE, Smith Y, and Hepler JR (2014) Postnatal developmental expression of regulator of G protein signaling 14 (RGS14) in the mouse brain. *J Comp Neurol* 522(1):186-203.
49. Ricklin D, and Lambris JD (2013) Complement in immune and inflammatory disorders: pathophysiological mechanisms. *J Immunol* 190(8):3831-8.
50. Galicia G, Lee DSW, Ramaglia V, Ward LA, Yam JY, Leung LYT, et al. (2018) Isotype-Switched Autoantibodies Are Necessary To Facilitate Central Nervous System Autoimmune Disease in Aicda(-/-) and Ung(-/-) Mice. *J Immunol* 201(4):1119-30.
51. Liddel SA, Guttenplan KA, Clarke LE, Bennett FC, Bohlen CJ, Schirmer L, et al. (2017) Neurotoxic reactive astrocytes are induced by activated microglia. *Nature* 541(7638):481-7.
52. Chevaleyre V, and Siegelbaum SA (2010) Strong CA2 pyramidal neuron synapses define a powerful disinhibitory cortico-hippocampal loop. *Neuron* 66(4):560-72.
53. Boehringer R, Polygalov D, Huang AJY, Middleton SJ, Robert V, Wintzer ME, et al. (2017) Chronic Loss of CA2 Transmission Leads to Hippocampal Hyperexcitability. *Neuron* 94(3):642-55 e9.

54. Nasrallah K, Therreau L, Robert V, Huang AJY, McHugh TJ, Piskorowski RA, et al. (2019) Routing Hippocampal Information Flow through Parvalbumin Interneuron Plasticity in Area CA2. *Cell Rep* 27(1):86-98 e3.
55. Halasy K, Hajszan T, Kovacs EG, Lam TT, and Leranth C (2004) Distribution and origin of vesicular glutamate transporter 2-immunoreactive fibers in the rat hippocampus. *Hippocampus* 14(7):908-18.
56. Herzog E, Takamori S, Jahn R, Brose N, and Wojcik SM (2006) Synaptic and vesicular co-localization of the glutamate transporters VGLUT1 and VGLUT2 in the mouse hippocampus. *J Neurochem* 99(3):1011-8.
57. Leroy F, Brann DH, Meira T, and Siegelbaum SA (2017) Input-Timing-Dependent Plasticity in the Hippocampal CA2 Region and Its Potential Role in Social Memory. *Neuron* 95(5):1089-102 e5.
58. Piskorowski RA, and Chevaleyre V (2013) Delta-opioid receptors mediate unique plasticity onto parvalbumin-expressing interneurons in area CA2 of the hippocampus. *J Neurosci* 33(36):14567-78.
59. Piskorowski RA, Nasrallah K, Diamantopoulou A, Mukai J, Hassan SI, Siegelbaum SA, et al. (2016) Age-Dependent Specific Changes in Area CA2 of the Hippocampus and Social Memory Deficit in a Mouse Model of the 22q11.2 Deletion Syndrome. *Neuron* 89(1):163-76.
60. Botcher NA, Falck JE, Thomson AM, and Mercer A (2014) Distribution of interneurons in the CA2 region of the rat hippocampus. *Front Neuroanat* 8:104.
61. Kole MH, and Stuart GJ (2012) Signal processing in the axon initial segment. *Neuron* 73(2):235-47.
62. Meira T, Leroy F, Buss EW, Oliva A, Park J, and Siegelbaum SA (2018) A hippocampal circuit linking dorsal CA2 to ventral CA1 critical for social memory dynamics. *Nat Commun* 9(1):4163.
63. Hibbits N, Pannu R, Wu TJ, and Armstrong RC (2009) Cuprizone demyelination of the corpus callosum in mice correlates with altered social interaction and impaired bilateral sensorimotor coordination. *ASN Neuro* 1(3).
64. Remmelink E, Smit AB, Verhage M, and Loos M (2016) Measuring discrimination- and reversal learning in mouse models within 4 days and without prior food deprivation. *Learn Mem* 23(11):660-7.
65. Lassmann H, and Bradl M (2017) Multiple sclerosis: experimental models and reality. *Acta Neuropathol* 133(2):223-44.
66. Lassmann H (2019) The changing concepts in the neuropathology of acquired demyelinating central nervous system disorders. *Curr Opin Neurol*.
67. Clarner T, Diederichs F, Berger K, Denecke B, Gan L, van der Valk P, et al. (2012) Myelin debris regulates inflammatory responses in an experimental demyelination animal model and multiple sclerosis lesions. *Glia* 60(10):1468-80.
68. Das A, Bastian C, Trestan L, Suh J, Dey T, Trapp BD, et al. (2019) Reversible Loss of Hippocampal Function in a Mouse Model of Demyelination/Remyelination. *Front Cell Neurosci* 13:588.
69. Buscemi L, Ginet V, Lopatar J, Montana V, Pucci L, Spagnuolo P, et al. (2017) Homer1 Scaffold Proteins Govern Ca<sup>2+</sup> Dynamics in Normal and Reactive Astrocytes. *Cereb Cortex* 27(3):2365-84.
70. Lehrman EK, Wilton DK, Litvina EY, Welsh CA, Chang ST, Frouin A, et al. (2018) CD47 Protects Synapses from Excess Microglia-Mediated Pruning during Development. *Neuron* 100(1):120-34 e6.

71. Okazawa H, Motegi S, Ohyama N, Ohnishi H, Tomizawa T, Kaneko Y, et al. (2005) Negative regulation of phagocytosis in macrophages by the CD47-SHPS-1 system. *J Immunol* 174(4):2004-11.
72. Oldenborg PA, Zheleznyak A, Fang YF, Lagenaur CF, Gresham HD, and Lindberg FP (2000) Role of CD47 as a marker of self on red blood cells. *Science* 288(5473):2051-4.
73. Oldenborg PA, Gresham HD, and Lindberg FP (2001) CD47-signal regulatory protein alpha (SIRPalpha) regulates Fc gamma and complement receptor-mediated phagocytosis. *J Exp Med* 193(7):855-62.
74. Gyorffy BA, Kun J, Torok G, Bulyaki E, Borhegyi Z, Gulyassy P, et al. (2018) Local apoptotic-like mechanisms underlie complement-mediated synaptic pruning. *Proc Natl Acad Sci U S A* 115(24):6303-8.
75. Del Rio T, and Feller MB (2006) Early retinal activity and visual circuit development. *Neuron* 52(2):221-2.
76. Chevaleyre V, and Piskorowski RA (2016) Hippocampal Area CA2: An Overlooked but Promising Therapeutic Target. *Trends Mol Med* 22(8):645-55.
77. Hoffmann K, Lindner M, Groticke I, Stangel M, and Loscher W (2008) Epileptic seizures and hippocampal damage after cuprizone-induced demyelination in C57BL/6 mice. *Exp Neurol* 210(2):308-21.
78. Mercer A, Trigg HL, and Thomson AM (2007) Characterization of neurons in the CA2 subfield of the adult rat hippocampus. *J Neurosci* 27(27):7329-38.
79. Stedehouder J, Couey JJ, Brizee D, Hosseini B, Slotman JA, Dirven CMF, et al. (2017) Fast-spiking Parvalbumin Interneurons are Frequently Myelinated in the Cerebral Cortex of Mice and Humans. *Cereb Cortex* 27(10):5001-13.
80. Pardini M, Bergamino M, Bommarito G, Bonzano L, Luigi Mancardi G, and Roccatagliata L (2014) Structural correlates of subjective and objective memory performance in multiple sclerosis. *Hippocampus* 24(4):436-45.
81. Planche V, Koubiyr I, Romero JE, Manjon JV, Coupe P, Deloire M, et al. (2018) Regional hippocampal vulnerability in early multiple sclerosis: Dynamic pathological spreading from dentate gyrus to CA1. *Hum Brain Mapp* 39(4):1814-24.
82. Rocca MA, Longoni G, Pagani E, Boffa G, Colombo B, Rodegher M, et al. (2015) In vivo evidence of hippocampal dentate gyrus expansion in multiple sclerosis. *Hum Brain Mapp* 36(11):4702-13.
83. Knable MB, Barci BM, Webster MJ, Meador-Woodruff J, Torrey EF, and Stanley Neuropathology C (2004) Molecular abnormalities of the hippocampus in severe psychiatric illness: postmortem findings from the Stanley Neuropathology Consortium. *Mol Psychiatry* 9(6):609-20, 544.



## **Acknowledgments**

We are grateful to the Electron Microscopy Centre Amsterdam (EMCA) of the Amsterdam UMC providing support with EM.

## **Funding**

The study has been funded by the National Multiple Sclerosis Society (RG-1602-07777) to V.R. and M.K. and the Netherlands Organization for Scientific Research (NWO Vici 865.17.003) to M.K. The funding agents did not play a role in the study design.

## **Competing interests**

The authors report no competing interests.

## **Author Contributions.**

V.R. and M.K. jointly conceptualized the study; V.R., M.D., M.M., N.P., S.V. D. L., G.S. and M.K. developed the methodological approaches; V.R., J.L.G., J.J.G.G. and M.K. provided the lab resources, V.R., M.D., M.M., N.P., S.V., D.L., G.S. and M.K. conducted the experiments.; V.R., M.M., N.P., G.S. and M.K. analysed the data; V.R. and M.K. wrote the original draft; All authors contributed to reviewing and editing the manuscript, and approved its final version.

## Figures

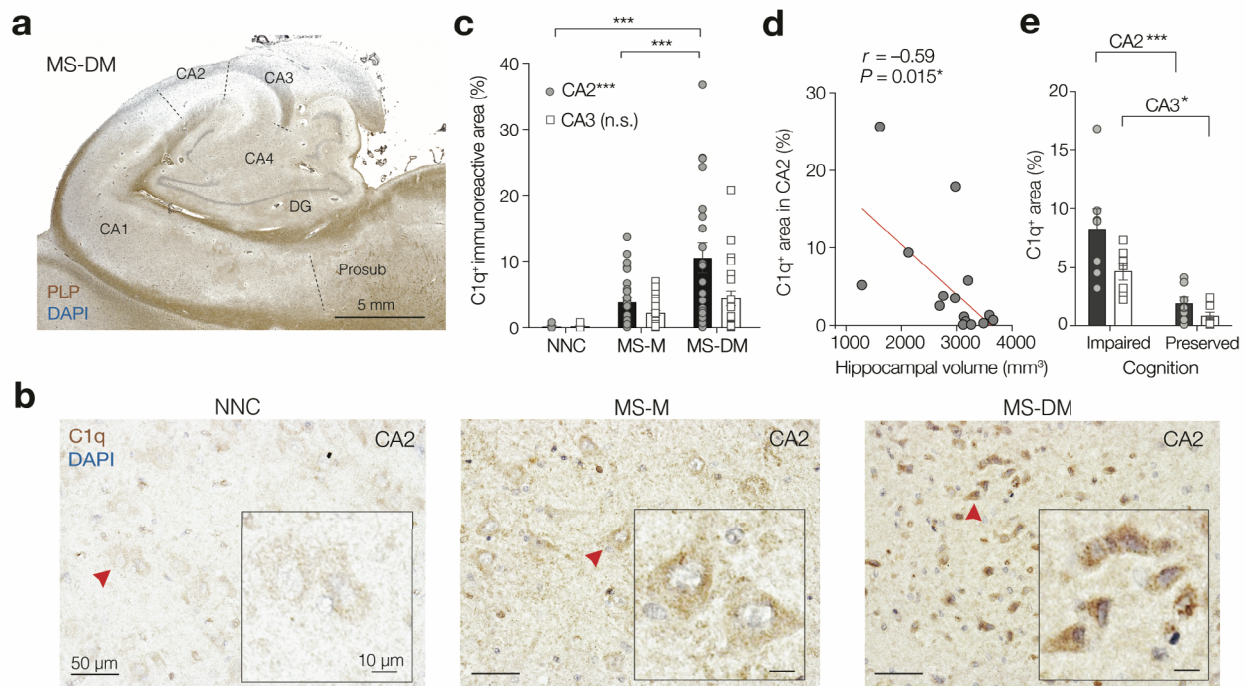

**Figure 1. Multiple sclerosis hippocampus shows demyelination-dependent upregulation of C1q in the CA2**

- Coronal view of the hippocampus of a person with MS with hippocampal demyelination (MS-DM) in CA2 and CA3 assessed by proteolipid protein (PLP, brown) and DAPI (blue).
- Higher magnification of the CA2 subfield of hippocampi from a non-neurological control case (NNC), an MS case with myelinated hippocampus (MS-M) and a MS-DM case. Red arrows indicate location of the the insets showing individual CA2 neurons at higher magnification. Note the increased C1q immunoreactivity in perisomatic domains of MS-M and MS-DM compared to NNC. Decentered neuronal nuclei are visible in the inset of MS-DM.
- Quantification of C1q immunoreactivity in post-mortem hippocampal CA2 and CA3 subfields. MS significantly increased C1q expression (two-way ANOVA  $F_{2, 109} = 11.36$ ,  $P < 0.0001$ , NNC  $n = 5$ , MS-M  $n = 30$ , MS-DM  $n = 21$ ), with a trend for subfield dependence ( $F_{1, 109} = 3.31$ ,  $P = 0.0636$ ). MS did not significantly upregulate C1q in the CA3 subfield (Sidak's multiple comparison tests MS-M and MS-DM versus NNC,  $t = 0.74$  and  $1.53$ , respectively,  $df = 109$  and n.s. for both). MS with hippocampal demyelination upregulated C1q in the CA2 area (For both MS-DM versus NNC and MS-DM versus MS-M; Sidak's multiple comparison's test,  $t = 3.72$  and  $4.21$ , respectively,  $***P < 0.0001$ ). Bars represent the mean  $\pm$  SEM; Grey circles and open squares represent individual hippocampi for CA2 and CA3 areas, respectively.
- Spearman's correlation coefficient showing a significant negative correlation between C1q immunoreactivity in CA2 and hippocampal volume as determined by

post-mortem MRI in a subcohort of MS cases (two-tailed exact  $P = 0.0145$ ,  $n = 17$  hippocampi).

- e. The intensity of C1q deposits was higher in MS donors with impaired cognitive/memory function compared to donors with preserved cognitive/memory function (two-way ANOVA cognition effect  $F_{1,24} = 26.44$ ,  $***P < 0.0001$ ) and different between regions (two-way ANOVA subfield effect  $F_{1,24} = 5.68$ ,  $P = 0.0254$ ,  $n = 7$  biological replicates for all groups). C1q is higher in cognitively impaired MS patients in both CA2 and CA3 (Sidak's multiple comparison test CA2,  $t = 4.55$ ,  $df = 24$ ,  $***P < 0.0001$  and CA3,  $t = 2.73$ ,  $df = 24$ ,  $*P < 0.01$ , respectively). Bars represent the mean  $\pm$  SEM; Circles and squares represent individual hippocampi for CA2 and CA3 areas, respectively.

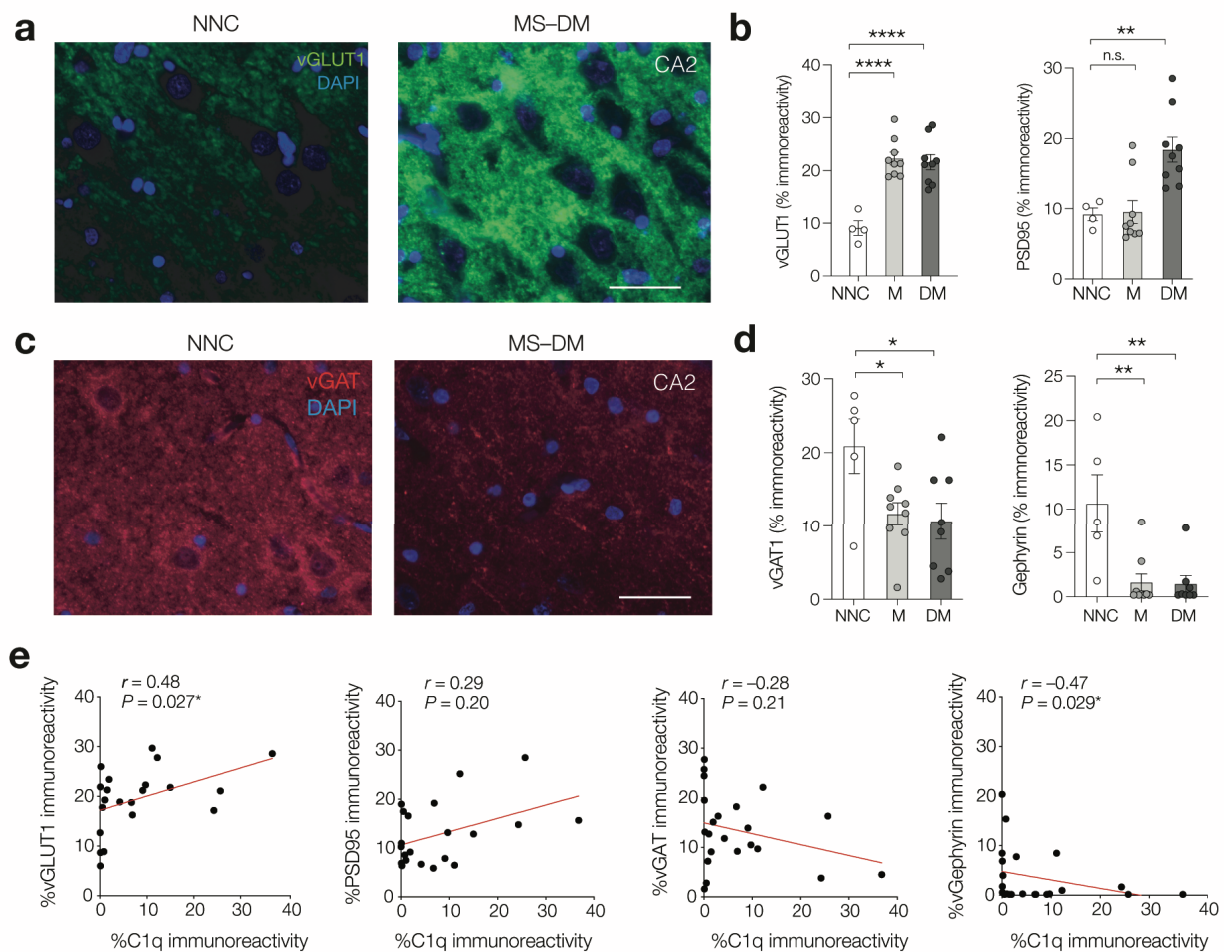

**Figure 2. Diverse synaptic changes in the MS CA2 region associate with C1q expression.**

- Immunofluorescence staining for vGLUT1 (in green) and DAPI (in blue) identifying glutamatergic synapses in CA2 stratum pyramidale of a non-neurological control (NNC) case and an MS case with demyelinated hippocampus (MS-DM). Scale bar, 20  $\mu$ m.
- Population analysis of vGLUT1 and PSD95 in CA2 of non-neurological control (NNC) cases and MS cases with myelinated (MS-M) or demyelinated (MS-DM) hippocampi. MS increased vGLUT1 density (One-way ANOVA  $F_{2, 19} = 18.55$ ,  $P < 0.0001$ , Dunnett's multiple comparison test MS-M versus NCC,  $q = 5.75$ ,  $df = 19$ , \*\*\*\* $P < 0.0001$ ; MS-DM versus NCC,  $q = 5.44$ ,  $df = 19$ , \*\*\*\* $P < 0.00001$ ) and PSD95 (One-way ANOVA  $F_{2, 19} = 9.63$ ,  $P = 0.0013$ , Dunnett's multiple comparison tests, MS-M versus NCC,  $q = 0.11$ ,  $df = 19$ ,  $P = 0.998$ ; MS-DM versus NCC,  $q = 3.24$ ,  $df = 19$ , \*\* $P = 0.0075$ ).
- Immunofluorescence staining for vGAT (in red) and DAPI (in blue) identifying GABAergic synapses in CA2 stratum pyramidale of a non-neurological control (NNC) case and an MS case with demyelinated hippocampus (MS-DM). Scale bar, 20  $\mu$ m.
- Population analysis of vGAT and gephyrin in CA2 in NNC, MS-M and MS-DM cases. MS is associated with a loss of inhibitory presynaptic component vGAT (One-way ANOVA  $F_{2, 19} = 4.41$ ,  $P = 0.0267$ , followed by Dunnett's tests; MS-M versus NNC,  $q = 2.56$ ,  $df = 19$ , \* $P = 0.034$ ; MS-DM versus NNC,  $q = 2.78$ ,  $df = 19$ , \* $P =$

0.021) as well as a loss of inhibitory postsynaptic density protein gephyrin (One-way ANOVA  $F_{2, 19} = 9.18$ ,  $P = 0.0016$ ) both for DM and M cases (Dunnnett's multiple comparison tests  $q = 3.87$ ,  $df = 19$ ,  $**P = 0.0019$  and  $q = 3.86$ ,  $df = 19$ ,  $**P = 0.0019$ , respectively).

- e. Correlation analyses between the amount of C1q and the amount of vGLUT1<sup>+</sup> or PSD95<sup>+</sup> or VGAT<sup>+</sup> or gephyrin<sup>+</sup> synapses in CA2 of MS cases ( $n = 17$ ). Spearman's correlation coefficient ( $r$ ) shows a significant positive correlation between the amount of C1q and the amount of vGLUT-1<sup>+</sup> synapses ( $n = 21$ ) whereas it shows a significant negative correlation between the amount of C1q and the amount of gephyrin<sup>+</sup> synapses ( $n = 22$ ). Two-tailed  $P$  values indicated in the figure panels.

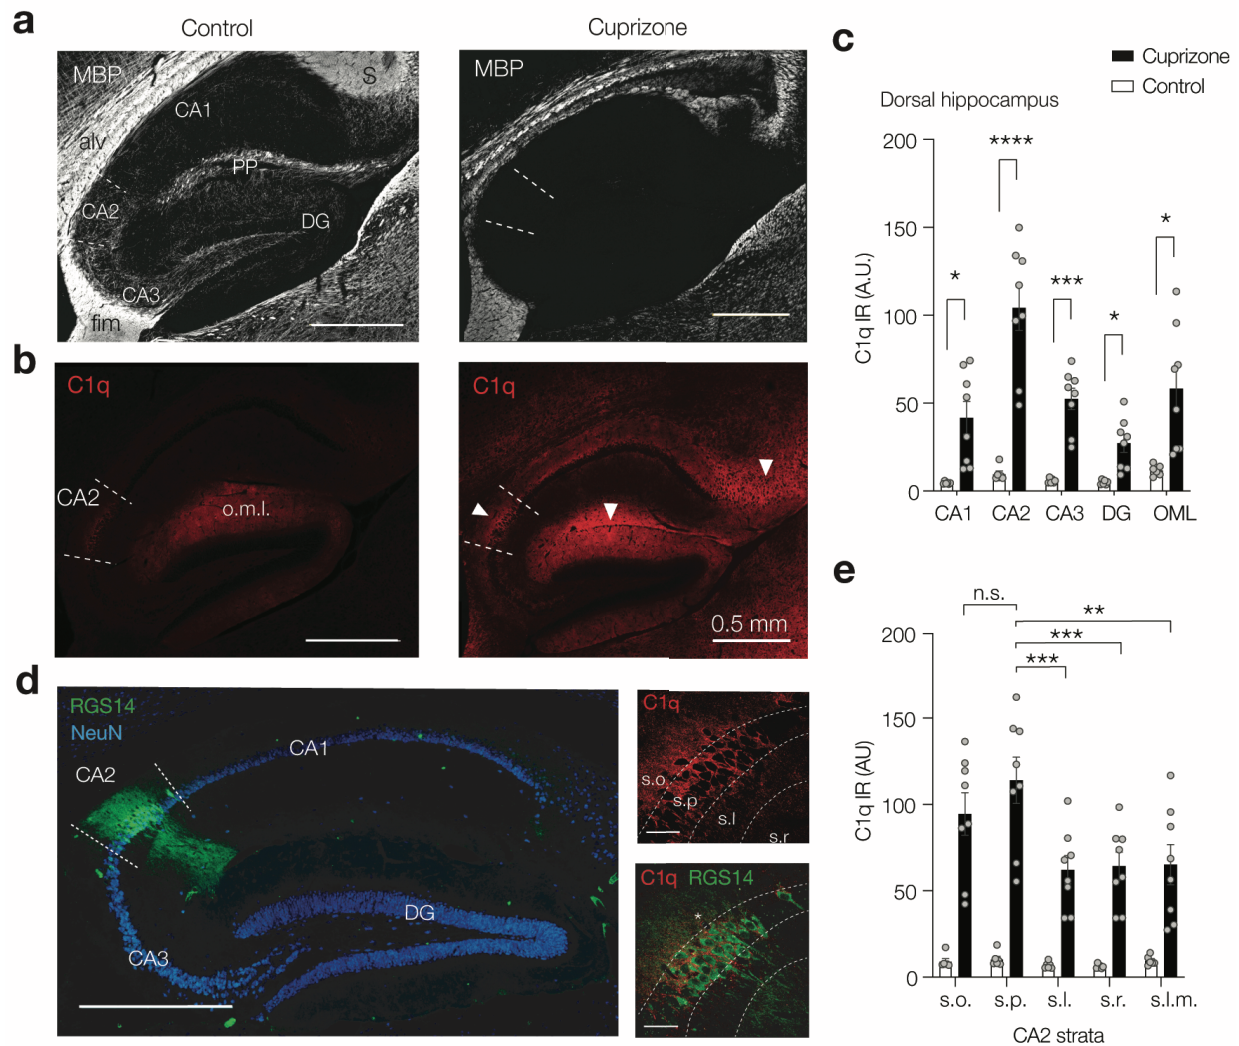

**Figure 3. Cuprizone-induced demyelination causes subregion dependent C1q increase**

- a.** *Left*, Example fluorescence image of a sagittal section of the control dorsal hippocampus for myelin basic protein (MBP-Ab, white) and, *right*, following 9 weeks 0.2% cuprizone treatment. In control, high intensity signals are present in the white-matter tracts including the alveus (alv) and fimbria (fim) and the myelinated perforant path (PP) fibers. Lower intensity signals are present in the CA3 and CA2 stratum pyramidal and oriens layer but also in the dentate granule (DG) molecular layers. Note the loss of intra-hippocampal MBP expression and intrahippocampal differences in MBP distribution with low levels in CA1 but relatively stronger signals in CA2 and CA3, as well as the and molecular layers of the DG. Scale bar, 0.5 mm.
- b.** *Left*, control expression of complement factor 1q (C1q-Ab, red). Low levels are visible in CA2 as well as the DG outer molecular layer (o.m.l.). *Right*, demyelination increases C1q (red) widely across hippocampal subfields and with high intensities in CA2, molecular layers and subiculum (white arrows).
- c.** Population analysis of C1q intensity in the dorsal hippocampus shows C1q immunoreactivity increases in a subregion-specific manner following cuprizone treatment (two-way RM ANOVA, Treatment  $F_{1, 12} = 23.71$ ,  $P = 0.0004$ ; Subregion  $F_{2180, 26.16} = 30.51$ ;  $P < 0.0001$  and Subregion  $\times$  Treatment  $F_{4, 48} = 23.02$ ,  $P < 0.0001$ ,

$n = 6$  sections from 3 animals/group). After cuprizone treatment the CA2 region shows the highest intensities in comparison to CA1, CA3, the outer molecular layer and the DG (Sidak's multiple comparisons test, CA1  $*P = 0.0261$ , CA2  $***P = 0.0007$ , CA3  $***P = 0.0007$ , DG  $*P = 0.0157$ , DG  $*P = 0.0357$ ). Post-hoc test for regions revealed C1q within CA2 was higher in comparison to all other subregions (Sidak's multiple comparisons test  $***P < 0.0001$ , data not shown).

- d.** *Left*, overview image of the hippocampus with the CA2-specific marker, anti-regulator of G protein signaling 14 (anti-RGS14, green), staining somata and dendrites of CA2 pyramidal neurons and anti-NeuN (blue). Scale bar, 500  $\mu\text{m}$ . *Right*, higher-magnification images reveal C1q clusters in the perisomatic of CA2 neurons (RGS14, green). One RGS14<sup>-</sup> neuron with perisomatic C1q indicated with an asterisk. Stratum oriens (s.o.), stratum pyramidale (s.p.), stratum lucidum (s.l.), stratum radiatum (s.r.) and stratum lacunosum-moleculare (s.l.m.). Scale bars, 50  $\mu\text{m}$ .
- e.** Population analysis of C1q intensity across the distinct strata within CA2 reveals a strata-specific cuprizone-induced C1q increase (2-way ANOVA Treatment  $F_{1, 60} = 156.8$ ,  $P < 0.0001$ , Strata  $F_{4, 60} = 3.69$   $P = 0.0094$  and Treatment  $\times$  strata  $F_{4, 60} = 2.95$ ,  $P = 0.0281$ ,  $n = 8$  sections from 4 mice) with after cuprizone treatment s.p. showing higher C1q intensity compared to other strata (Sidak's multiple comparison tests, versus s.l.m.  $**P = 0.0012$ , s.r.  $***P = 0.0009$ ,  $***s.luc P = 0.0005$ ). However, C1q intensities in s.p. and s.o. were similar,  $P = 0.668$ ). Error bars indicate mean  $\pm$  SEM and grey dots individual section.

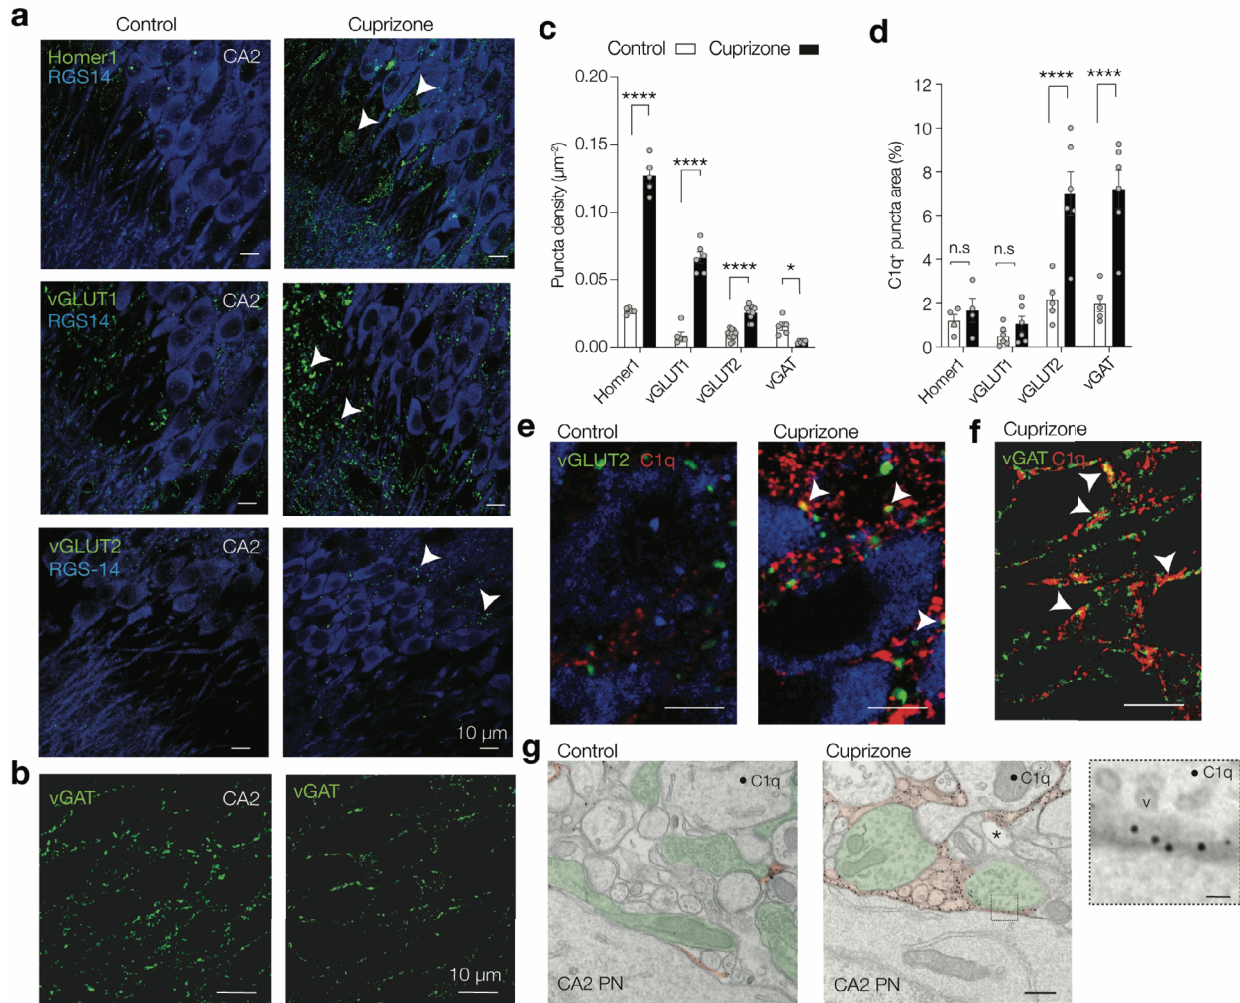

**Figure 4. Bidirectional change in excitatory and inhibitory synapse markers in CA2**

- Example immunofluorescent staining for RGS14 (blue) and postsynaptic glutamate receptor Homer1 (top, green), the presynaptic excitatory vesicular glutamate transporter 1 (vGLUT1, middle, green) and vGLUT2 (bottom, green) in control (left) and cuprizone hippocampus (right). Note the increase vGLUT1 puncta in the strata lucidum and radiatum and localization of vGLUT2 in pyramidal and oriens layers. White arrows indicate example puncta included in counting. Scale bar, 10  $\mu$ m.
- Example images of vesicular GABA transporter (vGAT, green) overlaid with DAPI (cyan) in the CA2 region of control (left) and cuprizone hippocampus (right). Note the loss in vGAT puncta. Scale bar, 10  $\mu$ m.
- Population data for synaptic marker densities reveals a gain in excitatory- but loss of inhibitory synapse markers (Two-way ANOVA Treatment effect  $F_{1,45} = 427.3$ ,  $P < 0.0001$ , Treatment  $\times$  Synapse marker interaction  $F_{2,45} = 139.4$ ,  $P < 0.0001$ , followed by Sidak's multiple comparison test for Homer1 ( $t = 22.95$ ,  $df = 45$ , \*\*\*\* $P < 0.0001$ ), vGLUT1 ( $t = 14.56$ ,  $df = 45$ , \*\*\*\* $P < 0.0001$ ), vGLUT2 ( $t = 5.25$ ,  $df = 45$ , \*\*\*\* $P < 0.0001$ ) and vGAT ( $t = 2.80$ ,  $df = 45$ , \* $P = 0.0297$ ). Each group represents  $n = 5$ –10 sections from 6 control and 4 cuprizone-treated mice.
- Population data for C1q co-localization (% area overlap) in control (open bars) and cuprizone-treated mice (closed bars). Cuprizone-induced increase in C1q is



differentially distributed across synapses (Two-way ANOVA treatment  $\times$  synapse  $F_{3,34} = 8.64$ ,  $P = 0.0002$ ) and significantly co-localizes to vGLUT2 and vGAT markers (Sidak's multiple comparison test  $t = 5.57$ ,  $df = 34$ , vGLUT2, \*\*\*\* $P < 0.0001$ ,  $n = 5$  control and 6 cuprizone, and vGAT  $t = 6.00$ ,  $df = 34$ , \*\*\*\* $P < 0.0001$ ,  $n = 5$  control and 6 cuprizone) but not Homer1 nor vGLUT1 markers (Sidak's multiple comparison tests, Homer1;  $t = 0.46$ ,  $df = 34$   $P = 0.985$ ,  $n = 4$  both groups and vGLUT1;  $t = 0.66$ ,  $df = 34$ ,  $P = 0.945$ ,  $n = 6$  both groups). Data represented as mean + SEM with individual sections indicated with circles.

- e. Example triple immunostaining images for RGS14 (blue), C1q (red) and vGLUT2 (green) in control and cuprizone hippocampus. White arrows indicate co-localization of C1q and vGLUT2 (yellow, white arrows). Scale bar, 10  $\mu\text{m}$ .
- f. Double immunostaining for vGAT (green) and C1q (red). Note the perisomatic localization of vGAT and co-localization with C1q (yellow color, white arrows). Scale bar, 10  $\mu\text{m}$ .
- g. Transmission EM images in the perisomatic region of a CA2 pyramidal neuron (CA2 PN) of a control (left) and a cuprizone-treated mouse (right). The anti-C1q immunogold ( $\sim 10$  nm black particles, false colored red) are predominantly in the extracellular space near synapses (false colored green), both near putative inhibitory or excitatory synapses (right image, note the asymmetric postsynaptic density and spine). Scale bar, 400 nm. Right inset, higher magnification of a putative inhibitory synapse at the CA2 soma with C1q-IR gold particles and synaptic vesicles (v). Scale bar, 50 nm.

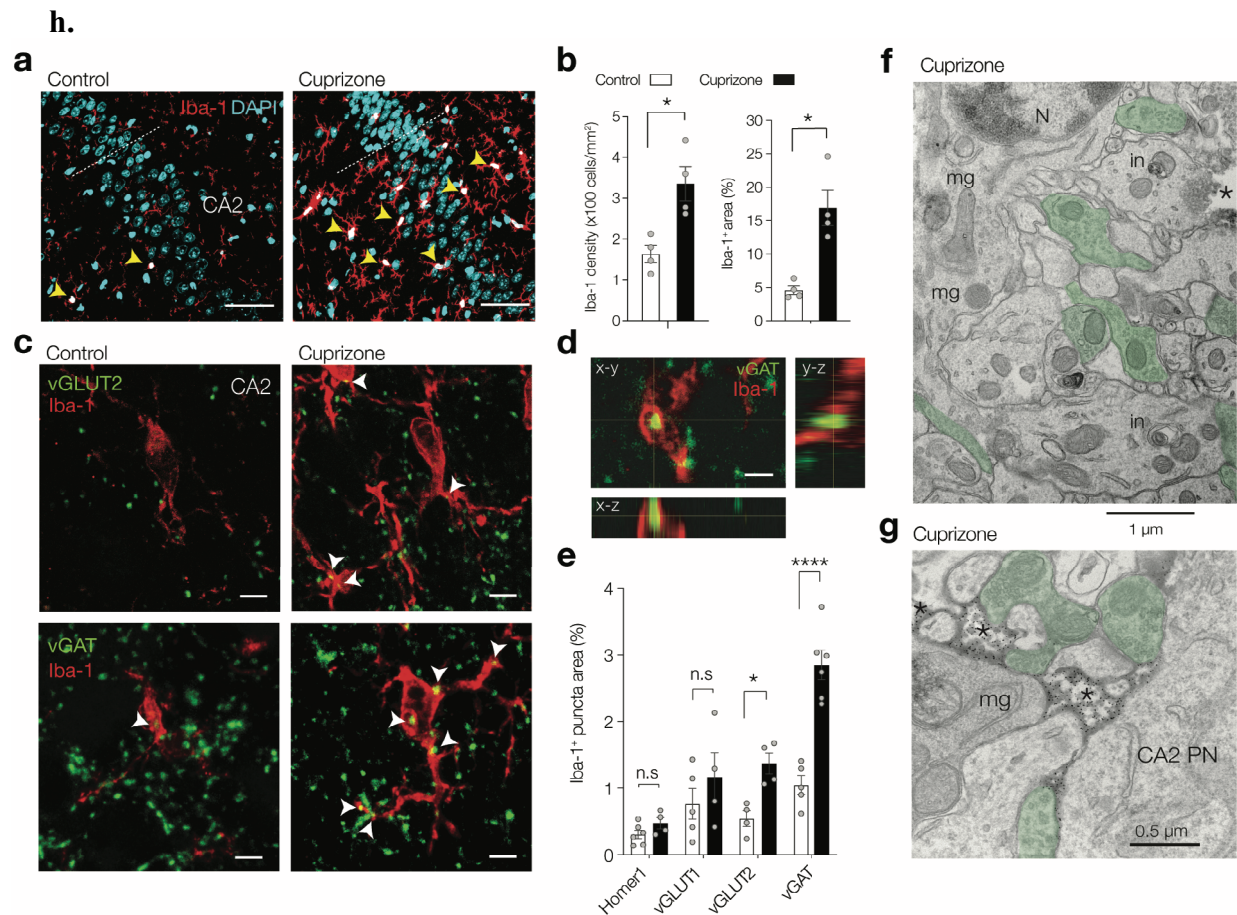

**Figure 5. Activated microglia preferentially target vGLUT-2 and vGAT synapses in the CA2 region**

- Cuprizone increases microgliosis (anti-Iba-1, red) in the hippocampal CA2 subfield, identified with nuclear DAPI stain (blue). Note the increased size of microglia/macrophages (yellow arrows). Scale bar, 50 μm.
- Population analysis of the percentage of DAPI and Iba-1 positive cells (DAPI<sup>+</sup> Iba-1<sup>+</sup>, white) within area CA2 shows cuprizone doubles the number of Iba-1<sup>+</sup> cells (two-tailed Mann-Whitney test  $P = 0.0286$ ) and increases the surface area by ~3-fold (two-tailed Mann-Whitney test  $P = 0.0286$ ,  $n = 4$  sections from 4 animals).
- Double immunostaining for Iba-1 and vGLUT2. Note the increased overlap between Iba-1 and vGLUT2 and vGAT (white arrows) in the face of a loss of vGAT puncta. Scale bar, 5 μm.
- Higher magnification and orthogonal view of a putatively engulfed vGAT<sup>+</sup> terminal (green) by Iba-1 (red). Same synapse as indicated by white arrow in c. Scale bar, 2 μm.
- Population data for the overlap of area between Iba-1 and synaptic markers Homer1, vGLUT1, vGLUT2 and vGAT shows a significant cuprizone treatment-induced preference of microglia contact with vGLUT2 and vGAT (Two-way ANOVA Treatment × Synapse marker  $F_{3,30} = 7.81$   $P = 0.0005$ , Treatment  $F_{1,30} = 34.17$ ,  $P < 0.0001$ , followed by Sidak's multiple comparison tests, Homer1  $t = 0.633$ ,  $df = 30$ ,  $P = 0.952$ ; vGLUT1  $t = 1.42$ ,  $df = 30$ ,  $P < 0.512$ ; vGLUT2  $t = 2.81$ ,  $df = 30$ ,  $*P = 0.0337$ ; vGAT  $t = 7.18$ ,  $df = 30$ ,  $****P < 0.0001$ , for all  $n = 4-6$  sections from  $n = 4$  animals/group).

- f.** EM of an activated microglia (*mg*) in the CA2 region. The microglia nucleus (*N*) is identified by clumped chromatin. Note the cell body extends a thick large process towards presynaptic terminals (false green colored). Microglia processes contained an inclusion with phagocytosed debris (*In*), lysosomes, golgi apparatus, mitochondria and ER.
- g.** Higher magnification of C1q-immunogold EM showing a microglia process with darker cytoplasm (*mg*) in the vicinity of a CA2 PN. C1q containing regions (black asterisks) are near presynaptic terminals (false green colored).

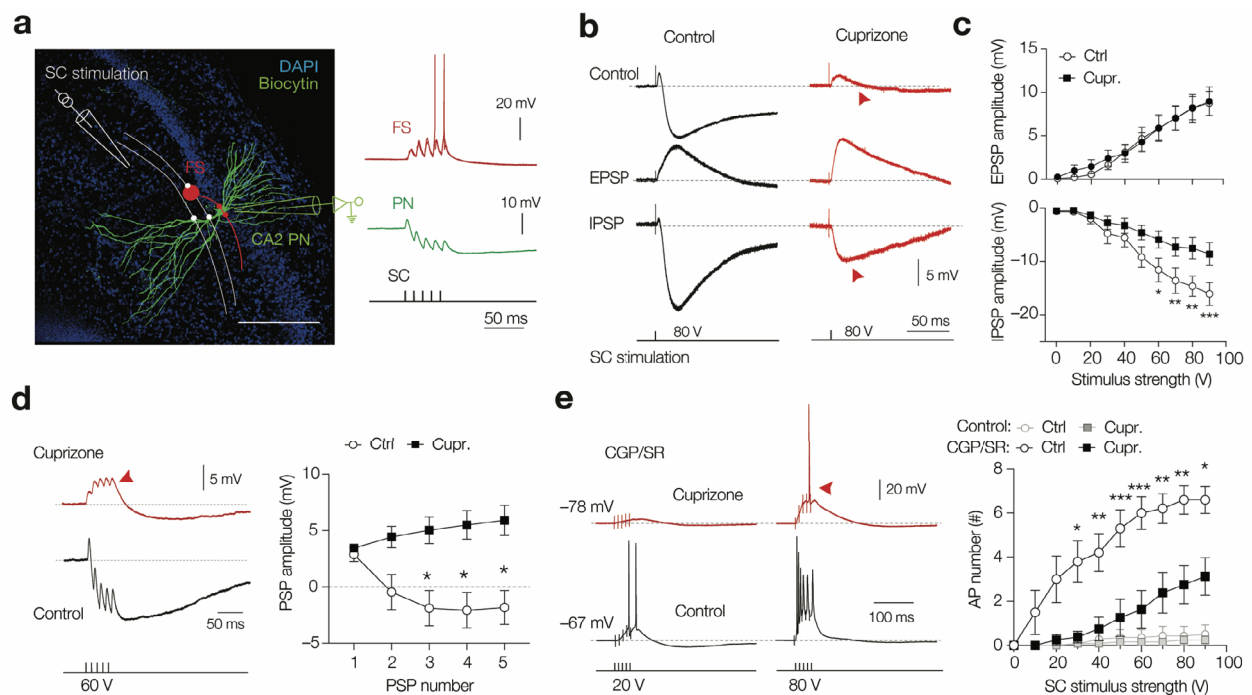

**Figure 6. Cuprizone causes a loss of CA3 to CA2 feedforward inhibition and synaptically-evoked spike generation.**

- Left, Immunofluorescence image of a biocytin-recovered CA2 pyramidal neuron (CA2 PN, green) and DAPI (blue) overlaid with schematic of a stimulation pipette for Schaffer collateral commissural axon fibers (SCs, white). Right, whole-cell recordings of a fast spiking (FS) interneuron showing typically strong temporal summation and SC-evoked spike output (red). In contrast, in CA2 PNs excitation is shunted by strong feedforward inhibition (green). SCs were activated with  $5 \times 60 \mu\text{V}$  pulses (100 Hz, 0.3 ms duration).
- Top, SC-evoked potentials in the CA2 PN from control (grey traces) and cuprizone (red traces). Middle, same recordings after bath application of the GABAergic antagonists CGP and SR, isolating excitatory postsynaptic potentials (EPSP, light gray). Bottom, digitally subtracted traces (control–EPSP) revealing the underlying IPSP. Note the reduced amplitude of the IPSP in CA2 PNs in slices from cuprizone-treated mice (red arrow).
- Population data for isolated EPSPs and IPSP as a function of stimulus strength (0–90  $\mu\text{V}$ ). The EPSPs amplitudes were unaffected by cuprizone treatment (mixed-effects model RM ANOVA, Treatment  $F_{1, 11} = 0.062$   $P = 0.809$ ,  $n = 5$  control and 8 cuprizone neurons from 6 mice/group). In contrast, IPSP peak amplitudes were significantly reduced (mixed-effects model RM ANOVA Treatment  $F_{1, 13} = 8.71$ ,  $P = 0.0112$ , Treatment  $\times$  stimulus interaction  $F_{9, 96} = 4.95$ ,  $P < 0.0001$ ,  $n = 8$  neurons from 6 mice/group) and increased at stimulus intensities  $> 60 \text{ V}$  (Sidak's multiple comparison test  $50 \text{ V } P = 0.071$ ,  $60 \text{ V } *P = 0.0146$ ,  $70 \text{ V } **P < 0.0053$ ,  $80 \text{ V } **P = 0.0017$  and  $90 \text{ V } ***P = 0.0010$ )
- Left, example traces of SC-evoked postsynaptic potentials, reflecting small excitation followed by feedforward inhibition (control) at 100 Hz train of subthreshold 60 V stimuli. Note the strong accumulation of inhibitory potentials in

control CA2 neurons but not in cuprizone neurons (red arrow). Right, population data of the average peak amplitude responses (positive deflection relative to resting potential) as a function of stimulus pulse number (2-way RM ANOVA stimulus  $F_{1244, 25} = 2.53$ ,  $P = 0.12$ , Treatment  $F_{20, 80} = 16.26$ ,  $P = 0.0076$ , Treatment  $\times$  stimulus interaction  $F_{4, 80} = 8.477$ ,  $P < 0.0001$ ) with significantly increased amplitudes for the 3<sup>rd</sup> to 5<sup>th</sup> stimulus (For all, Sidak's multiple comparisons test  $P < 0.05$ ,  $n = 13$  control and 9 cuprizone neurons from 6 mice/group).

- e. Left, example traces for SC evoked excitation at 100 Hz in the presence of CGP 35348 and SR 95531. Note the low spike probability in the recordings from cuprizone treatment (top, red traces). Population data summarizing AP number per train across the range of stimuli in physiological extracellular solution (control, gray lines and symbols) or with blocked inhibition (CGP/SR, black open and closed symbols). Cuprizone suppressed SC-mediated CA2 PN spike output in stimulus strength dependence (two-way ANOVA Treatment  $F_{1, 15} = 14.79$ ,  $P = 0.0016$  Treatment  $\times$  stimulus  $F_{9, 135} = 4.183$ ,  $P < 0.0001$ ).

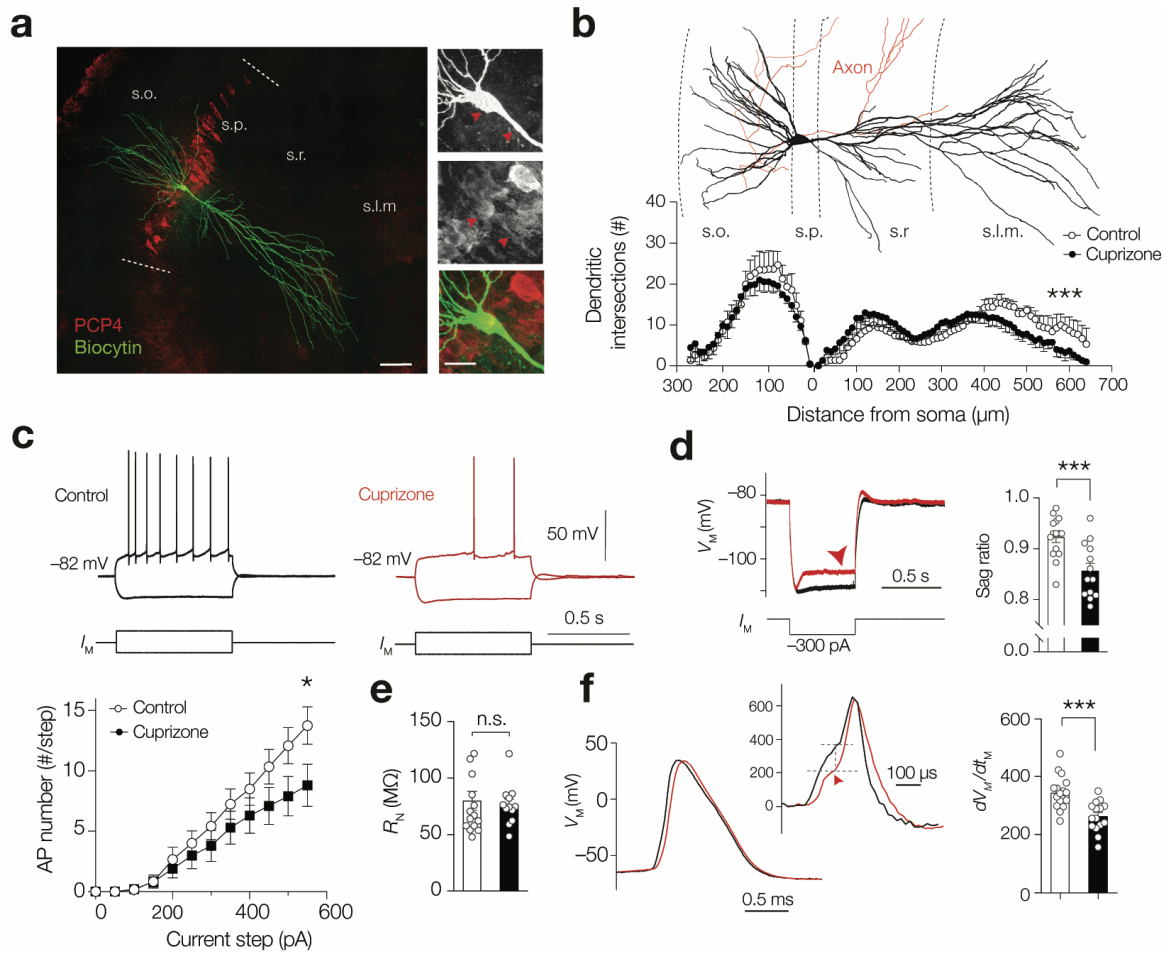

**Figure 7. Cuprizone-induced demyelination reduces dendritic input sites and action potential generation in CA2 pyramidal neurons**

- Immunofluorescence image of a whole-cell recorded and biocytin-filled pyramidal neuron (streptavidin-biocytin, green), which was positive for the CA2 marker PCP4 (red). Scale bar, 100  $\mu\text{m}$ . Inset scale, 25  $\mu\text{m}$ . Red arrows indicate somatic and dendritic PCP4 expression.
- Top, example 3D morphological reconstruction of a CA2 pyramidal neuron from a control hippocampus. Axon in red. Bottom, Scholl plot analysis of control versus cuprizone neurons ( $n = 5$  control neurons,  $n = 6$  cuprizone), revealing a differential distribution of dendrites in the apical dendrites (mixed-effect RM ANOVA Treatment  $\times$  Scholl ring interaction  $F_{64, 530} = 1.85$ ,  $***P < 0.0001$ , Treatment  $F_{1, 9} = 0.088$ ,  $P < 0.77$ ) but not in basal dendrites (Treatment  $\times$  Scholl interaction  $F_{27, 222} = 0.70$ ,  $P = 0.863$ ).
- Characteristic CA2 pyramidal neuron spike generation of a control CA2 and cuprizone-treated CA2 PN, showing delayed action potentials and near threshold ramp depolarization. Current-frequency ( $I$ - $f$ ) plots for CA2 PNs shows cuprizone reduces the maximum spike output rate (two-way RM ANOVA Treatment  $P = 0.1799$ , Treatment  $\times$  current step interaction  $P = 0.0044$ , Holm-Sidak's multiple comparison tests, for 0 to 500 pA  $P > 0.088$ , 550 pA  $*P = 0.022$ , cuprizone,  $n = 10$  and  $n = 12$  control neurons from 5 mice/group). Data represent mean  $\pm$  SEM.

- d.** Cuprizone increased the sag ratio to hyperpolarized steps near  $-110$  mV (unpaired  $t$ -test, two-tailed  $t$ -test  $***P = 0.0007$ ,  $n = 10$  cuprizone and 15 control neurons, 5 mice/group).
- e.** Input resistance ( $R_N$ ) was similar between groups (two-tailed  $t$ -test  $P = 0.898$ ,  $n = 10$  cuprizone and 15 control neurons, 5 mice/group).
- f.** Action potentials are slower at their onset rate  $dV/dt$  (inset), reflecting axonal charging of the somatodendritic domain (two-tailed  $t$ -test  $***P = 0.0002$ ,  $n = 15$  cuprizone and 17 control neurons, 5 mice/group). For **d**, **e**, **f**, Bars represent mean  $\pm$  SEM with circles individual cells.

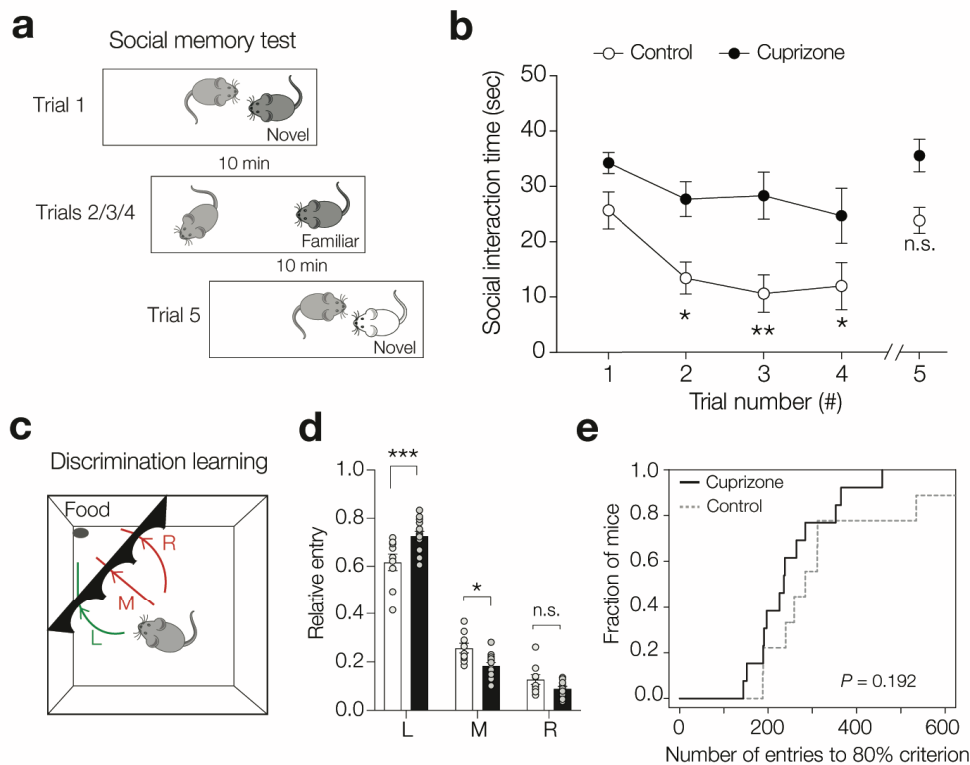

**Figure 8. Cuprizone-induced demyelination impairs social memory but not discrimination learning**

- Schematic of the five-trial social memory test. Subject animals (light grey) were placed in a cage and after 15 min an unfamiliar novel mouse was introduced for a 1-minute trial duration. The stimulus reintroduced 4 times (trials 2 to 4) with each 10 minutes inter-trial intervals. Subject mice are expected to show habituation based on memorizing social cues. At the 5<sup>th</sup> trial a novel mouse was introduced to measure dishabituation.
- Population analysis for the total time spent by the subject mouse socially investigating the stimulus mouse (anogenital sniffing, approaching and close proximity behaviors). Cuprizone treatment caused a significantly different habituation behavior (two-way repeated measures ANOVA, Treatment  $F_{1,20}=13.72$ ,  $P = 0.0014$ , Trial  $\times$  Treatment  $F_{4,80}=0.78$ ,  $P = 0.779$ ). Control mice habituated in trials 2, 3 and 4 (Bonferroni's multiple comparisons tests compared to trial 1,  $t = 4.39$ ,  $*P = 0.010$ ;  $t = 4.91$ ,  $**P = 0.0049$ ;  $t = 3.69$ ,  $**P = 0.034$ , respectively) and dishabituated in trial 5 ( $t = 0.66$ ,  $P > 0.99$ ,  $df = 10$ ,  $n = 11$  mice). In contrast, cuprizone mice did not show habituation compared to control trial 1 (Bonferroni's multiple comparisons tests,  $t = 2.01$ ,  $*P = 0.56$ ;  $t = 1.16$ ,  $P > 0.99$ ;  $t = 1.83$ ,  $P = 0.778$  and  $t = 0.33$ ,  $P > 0.99$ , respectively,  $df = 10$ ,  $n = 11$  mice). Data show mean  $\pm$  SEM.
- Schematic design of the automated PhenoTyper arrangement showing the cognition wall with three ports and an automated food pellet dispenser. Mice needed to engage in a continuously running task to be rewarded with a pellet food, automatically dispensed when the mouse ran 5 times through the left port (green line, discrimination stimulus).



- d.** Cuprizone-treated mice showed increased preference for the left and middle ports (ordinary two-way ANOVA Treatment  $\times$  port interaction  $F_{2, 60} = 12.48$ ,  $P < 0.0001$ . Data represent mean  $\pm$  SEM with individual mice indicated with circles.
- e.** Cumulative distribution plot of the fraction of mice versus total number of the total number of entries until 80% learning criterion (Chi-square test = 1.85,  $P = 0.192$ ,  $n = 9$  control and  $n = 13$  cuprizone mice).
